# Supplementary material for: 2-(2,6-Diisopropylphenyl)-1-methylimidazo[1,5-a]quinolin-2-ium tetrafluoroborate
Source: Preprints.org preprint supplement (doi:10.20944/preprints202408.0304.v1), 2024-08-06
Supplement: Supplementary file 1 [file supplementary]

## Supplementary Materials

### 2-(2,6-Diisopropylphenyl)-1-methylimidazo[1,5-a]quinolin-2-ium tetrafluoroborate

Lyuben Borisлавov<sup>1</sup>, Iskra Koleva<sup>2a</sup>, Vesela Lozanova<sup>3</sup>, Maria Ivanova<sup>2b</sup> and Rumen Lyapchev<sup>2c,\*</sup>

<sup>1</sup>Institute of General and Inorganic Chemistry, Bulgarian Academy of Sciences, 1113 Sofia, Bulgaria; lborislavov@svr.igic.bas.bg

<sup>2a</sup>Faculty of Chemistry and Pharmacy, Sofia University, 1 James Bourchier Blvd., 1164 Sofia, Bulgaria; ohik@chem.uni-sofia.bg

<sup>2b</sup>Faculty of Chemistry and Pharmacy, Sofia University, 1 James Bourchier Blvd., 1164 Sofia, Bulgaria; mariahi@uni-sofia.bg

<sup>2c</sup>Faculty of Chemistry and Pharmacy, Sofia University, 1 James Bourchier Blvd., 1164 Sofia, Bulgaria; ohrl@chem.uni-sofia.bg

<sup>3</sup>Department of Medicinal Chemistry and Biochemistry, Medicinal University of Sofia, 1431 Sofia, Bulgaria; vlozanova@medfac.mu-sofia.bg

\*Correspondence: [ohrl@chem.uni-sofia.bg](mailto:ohrl@chem.uni-sofia.bg);

#### List of content:

|                                                                            |         |
|----------------------------------------------------------------------------|---------|
| 1. NMR <sup>1</sup> H-spectra of compound 4                                | S2-S3   |
| 2. NMR <sup>13</sup> C-spectra of compound 4                               | S4-S5   |
| 3. NMR <sup>1</sup> H-spectra of compound 2                                | S6-S7   |
| 4. NMR <sup>13</sup> C-spectra of compound 2                               | S8-S10  |
| 5. NMR 2D spectra – COSY, HSQC, HMBS of compound 2                         | S11-S12 |
| 6. NMR <sup>1</sup> H and <sup>13</sup> C-spectra of compound 1 in DMSO    | S13-S17 |
| 7. NMR 2D spectra – COSY, HSQC, HMBS of compound 1 in DMSO                 | S18-S19 |
| 8. NMR <sup>1</sup> H and <sup>13</sup> C-spectra of compound 1 in metanol | S20-S24 |
| 9. NMR 2D spectra – COSY, HSQC, HMBS of compound 1 in metanol              | S25-S26 |
| 10. UV, fluorescent and IR spectra of compound 1 in (a) MeOH and (b) MeCN. | S26-S28 |

## NMR $^1\text{H}$ -spectra of compound **4**

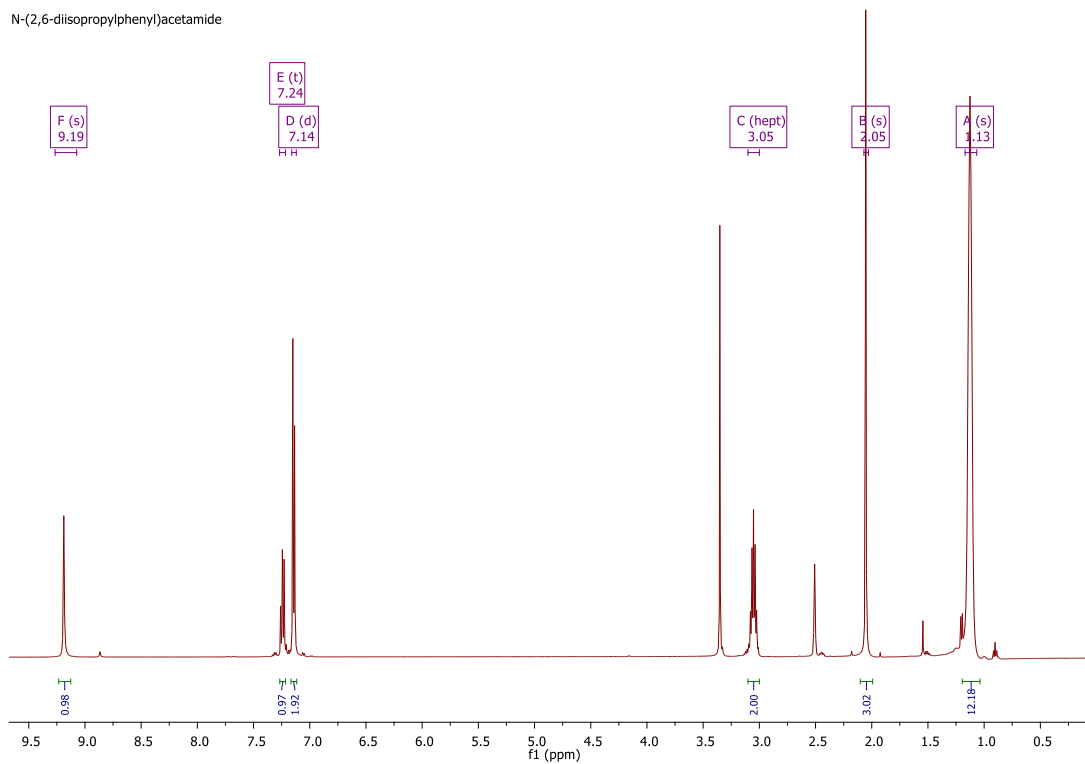

**Figure S1.**  $^1\text{H}$ -NMR spectrum of N-(2,6-diisopropylphenyl)acetamide **4** in DMSO.

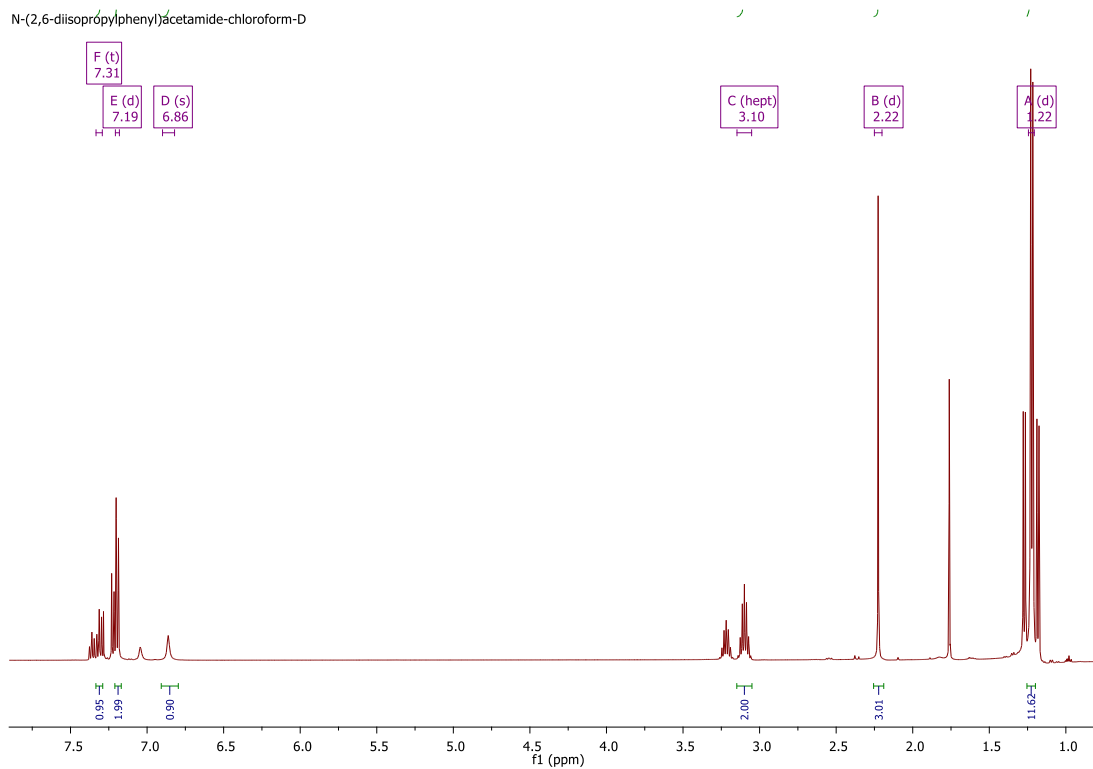

**Figure S2.**  $^1\text{H}$ -NMR spectrum of N-(2,6-diisopropylphenyl)acetamide **4** in  $\text{CDCl}_3$ . Only the signals of the major form are integrated and marked.

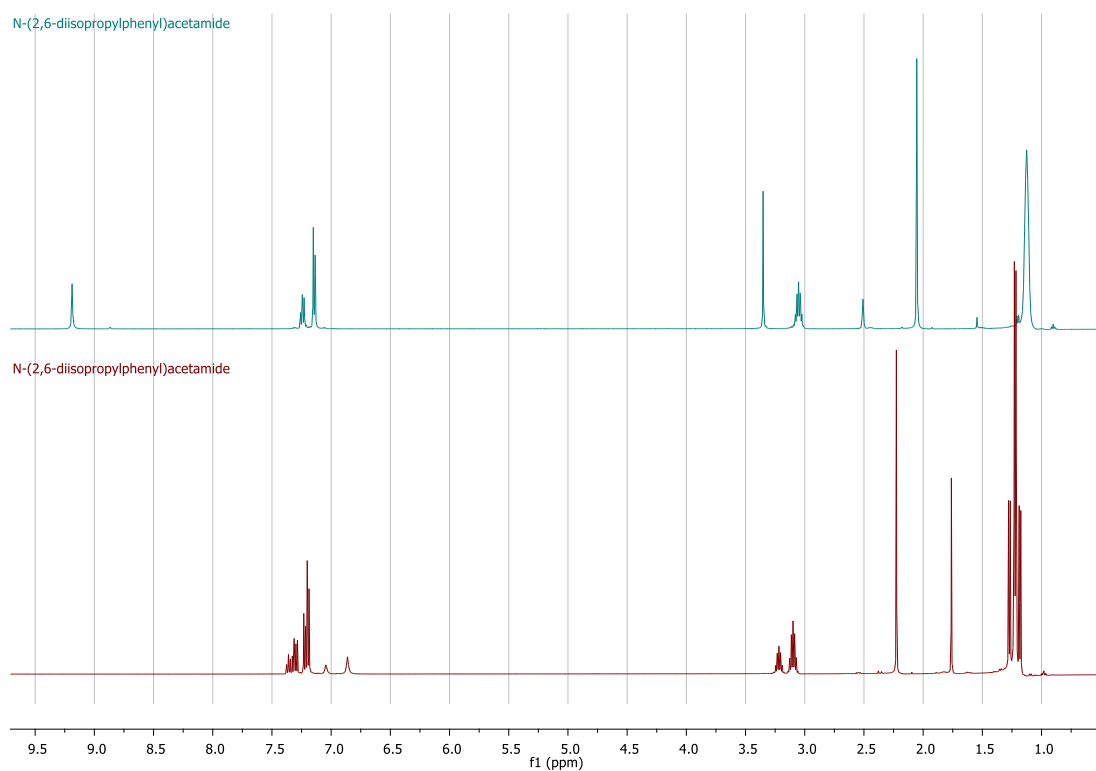

**Figure S3.** Comparison between <sup>1</sup>H-NMR spectra of N-(2,6-diisopropylphenyl)acetamide **4** in deuterated DMSO (blue coloured) and CDCl<sub>3</sub> (red coloured).

## NMR $^{13}\text{C}$ -spectra of compound **4**

N-(2,6-diisopropylphenyl)acetamide-DMSO-d<sub>6</sub>-DEPT-135

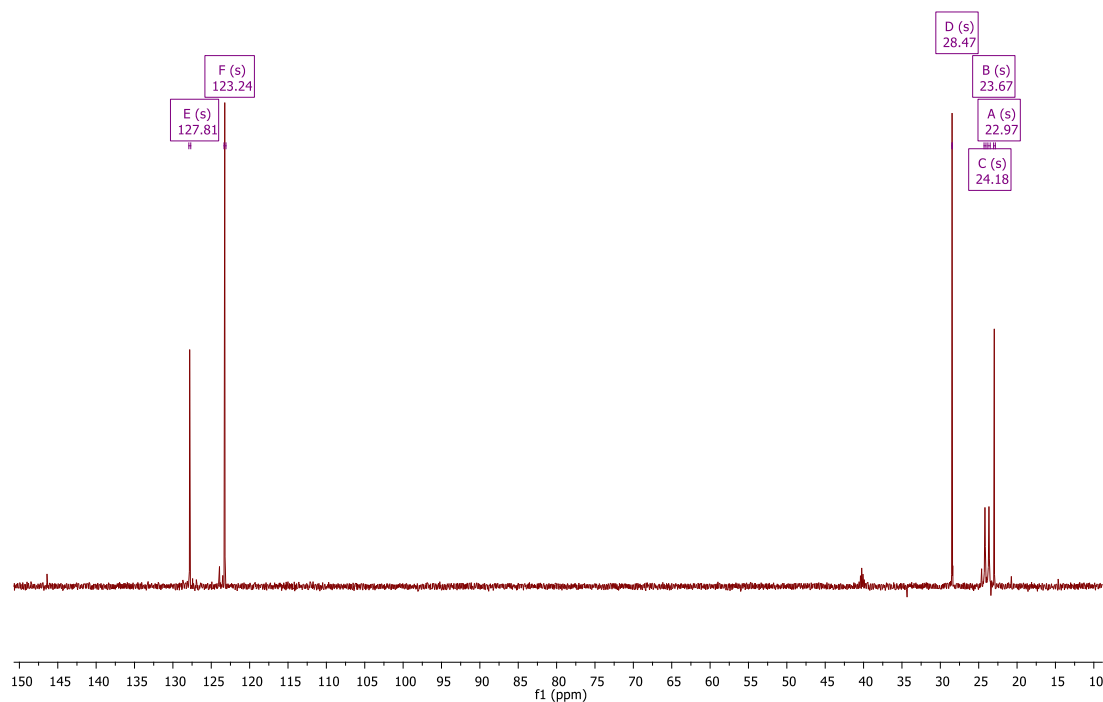

**Figure S4.** DEPT-135-NMR spectrum of N-(2,6-diisopropylphenyl)acetamide **4** in DMSO.

N-(2,6-diisopropylphenyl)acetamide-DMSO-d<sub>6</sub>- $^{13}\text{C}$

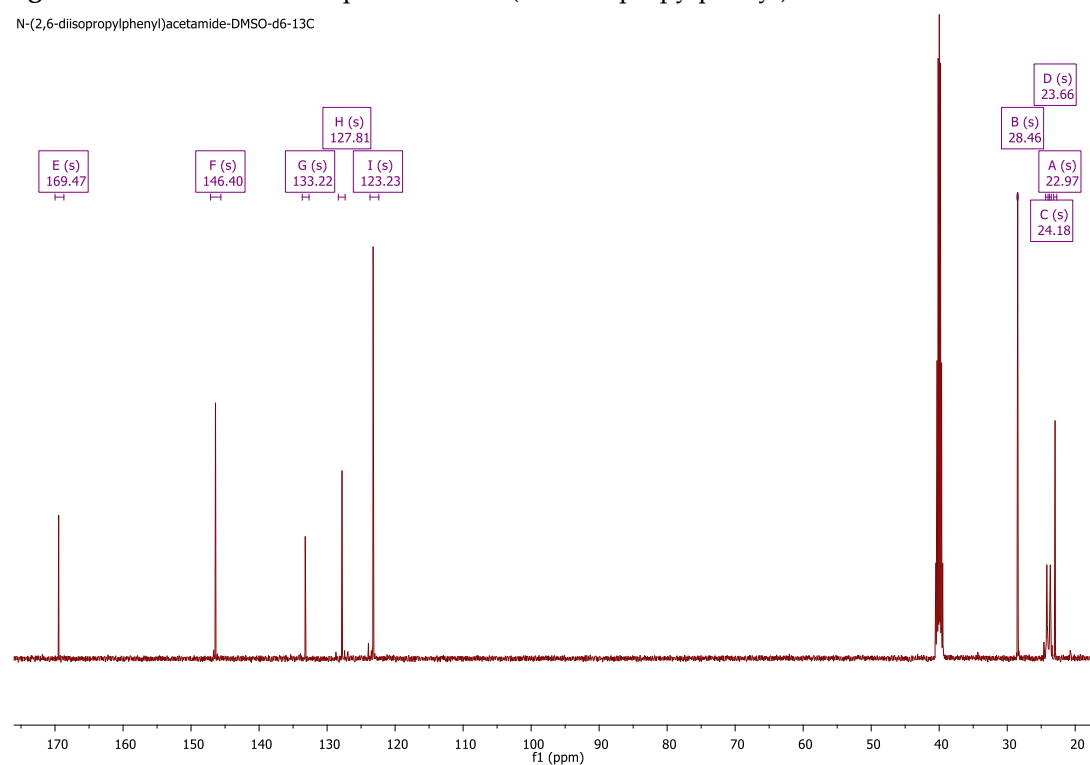

**Figure S5.**  $^{13}\text{C}$ -NMR spectrum of N-(2,6-diisopropylphenyl)acetamide **4** in DMSO.

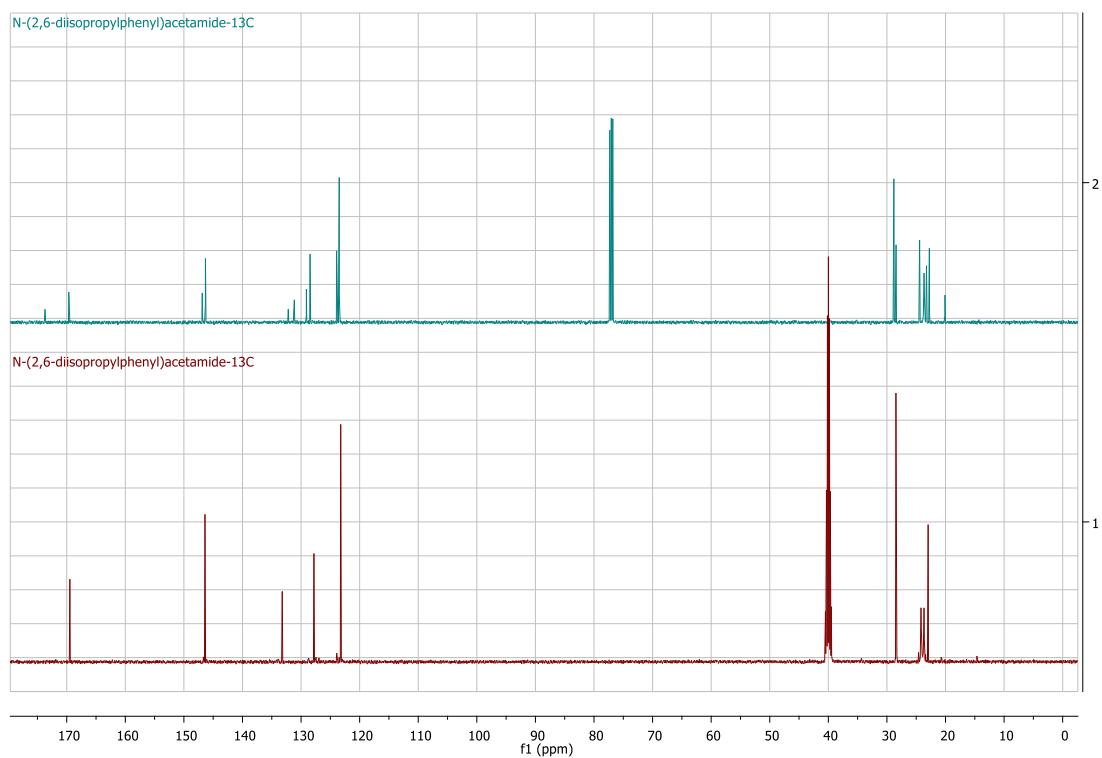

**Figure S6.** Comparison between  $^{13}\text{C}$ -NMR spectra of N-(2,6-diisopropylphenyl)acetamide **4** in deuterated  $\text{CDCl}_3$  (blue coloured) and  $\text{DMSO}$  (red coloured).

## NMR $^1\text{H}$ -spectra of compound **2**

N-(2,6-diisopropylphenyl)-N-(quinolin-2-ylmethyl)acetamide-chloroform

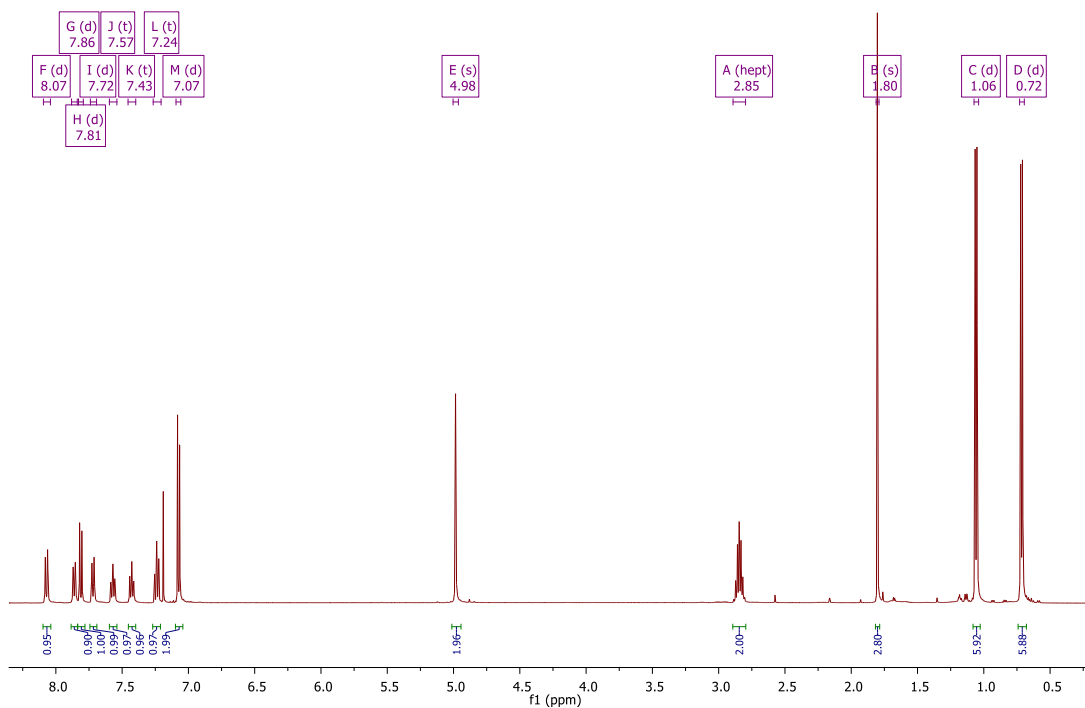

**Figure S7.**  $^1\text{H}$ -NMR spectrum of N-(2,6-diisopropylphenyl)-N-(quinolin-2-ylmethyl)acetamide **2** in  $\text{CDCl}_3$ .

N-(2,6-diisopropylphenyl)-N-(quinolin-2-ylmethyl)acetamide-chloroform

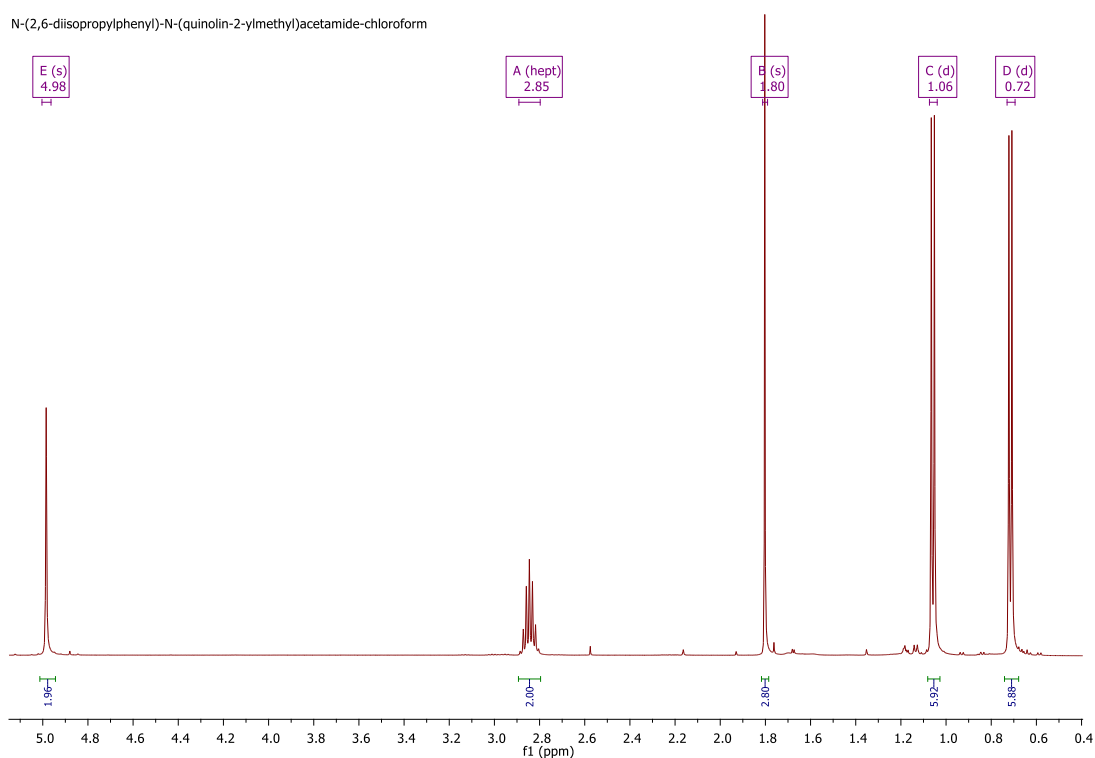

**Figure S8.**  $^1\text{H}$ -NMR spectrum of N-(2,6-diisopropylphenyl)-N-(quinolin-2-ylmethyl)acetamide **2** in  $\text{CDCl}_3$  at the 0.6-5.0 ppm region.

N-(2,6-diisopropylphenyl)-N-(quinolin-2-ylmethyl)acetamide-chloroform

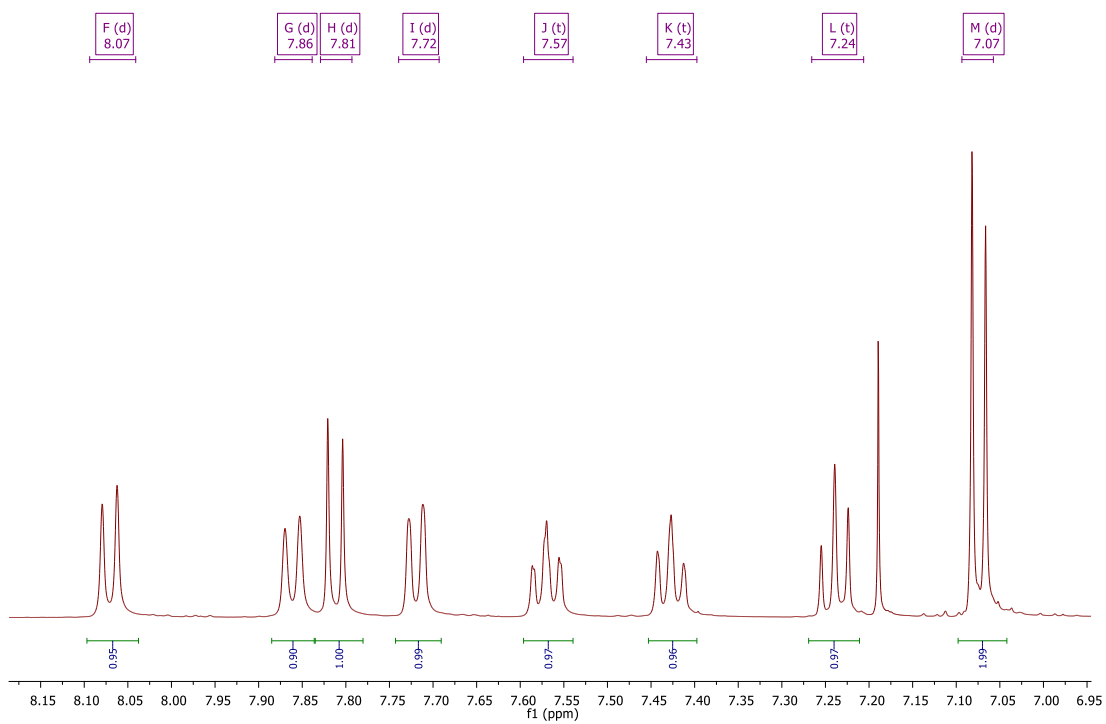

**Figure S9.** <sup>1</sup>H-NMR spectrum of N-(2,6-diisopropylphenyl)-N-(quinolin-2-ylmethyl)acetamide **2** in CDCl<sub>3</sub> at the 7.00-8.10 ppm region.

## NMR $^{13}\text{C}$ -spectra of compound **2**

N-(2,6-diisopropylphenyl)-N-(quinolin-2-ylmethyl)acetamide-DEPT-135

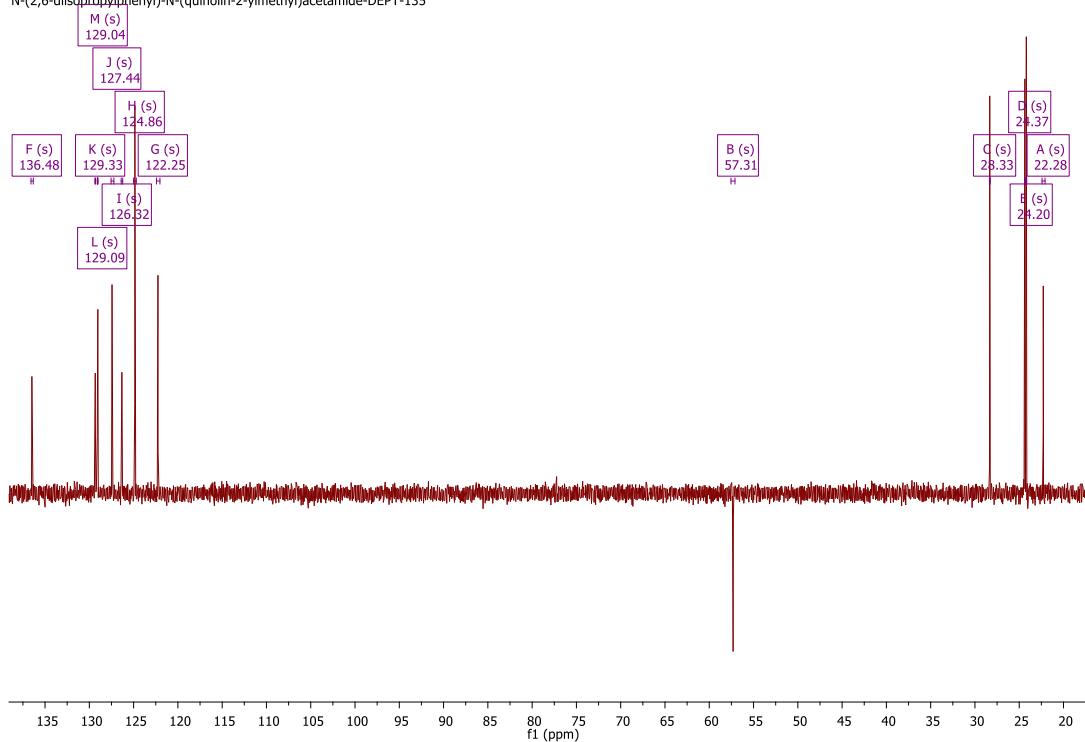

**Figure S10.** DEPT-135-NMR spectrum of N-(2,6-diisopropylphenyl)-N-(quinolin-2-ylmethyl)acetamide **2** in  $\text{CDCl}_3$ .

N-(2,6-diisopropylphenyl)-N-(quinolin-2-ylmethyl)acetamide-DEPT-135

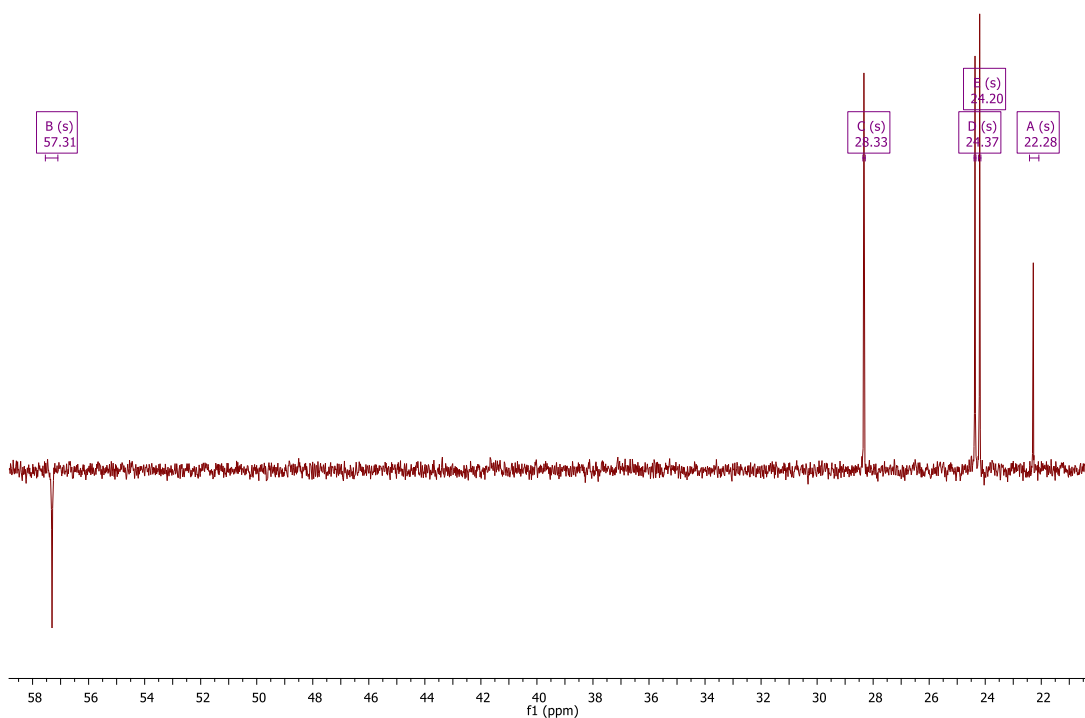

**Figure S11.** DEPT-135-NMR spectrum of N-(2,6-diisopropylphenyl)-N-(quinolin-2-ylmethyl)acetamide **2** in  $\text{CDCl}_3$  at the 22.00-58.00 ppm region.



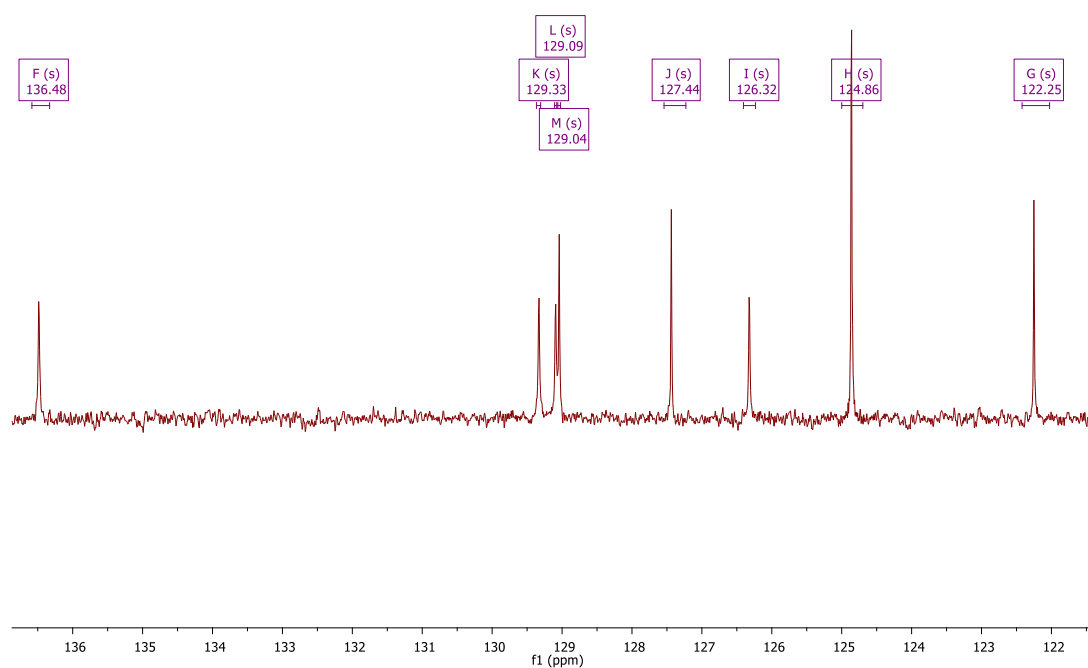

**Figure S12.** DEPT-135-NMR spectrum of N-(2,6-diisopropylphenyl)-N-(quinolin-2-ylmethyl)acetamide **2** in CDCl<sub>3</sub> at the 122.00-137.00 ppm region.

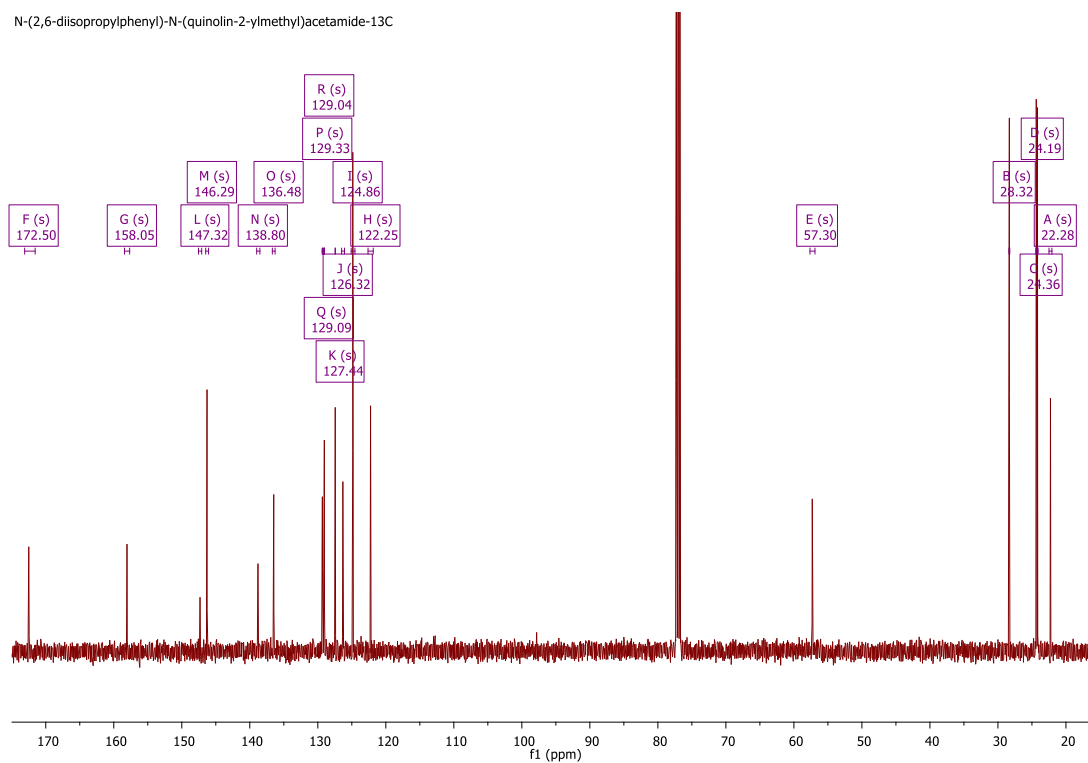

**Figure S13.** <sup>13</sup>C-NMR spectrum of N-(2,6-diisopropylphenyl)-N-(quinolin-2-ylmethyl)acetamide **2** in CDCl<sub>3</sub>.

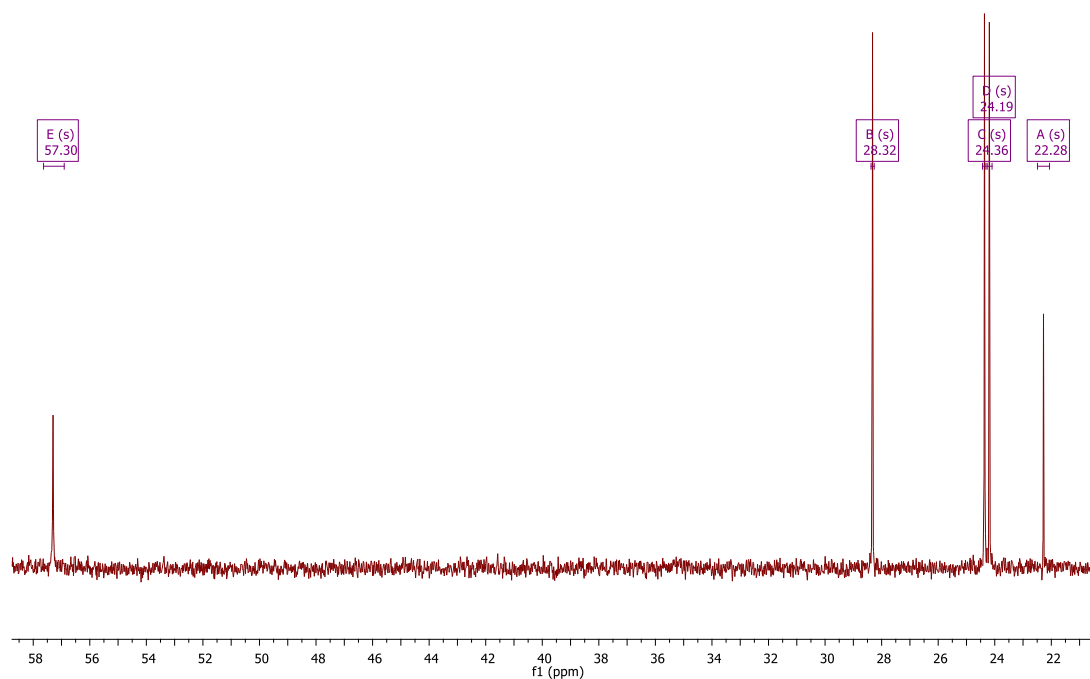

**Figure S14.**  $^{13}\text{C}$ -NMR spectrum of N-(2,6-diisopropylphenyl)-N-(quinolin-2-ylmethyl)acetamide **2** in  $\text{CDCl}_3$  at the 22.00-58.00 ppm region.

N-(2,6-diisopropylphenyl)-N-(quinolin-2-ylmethyl)acetamide-13C

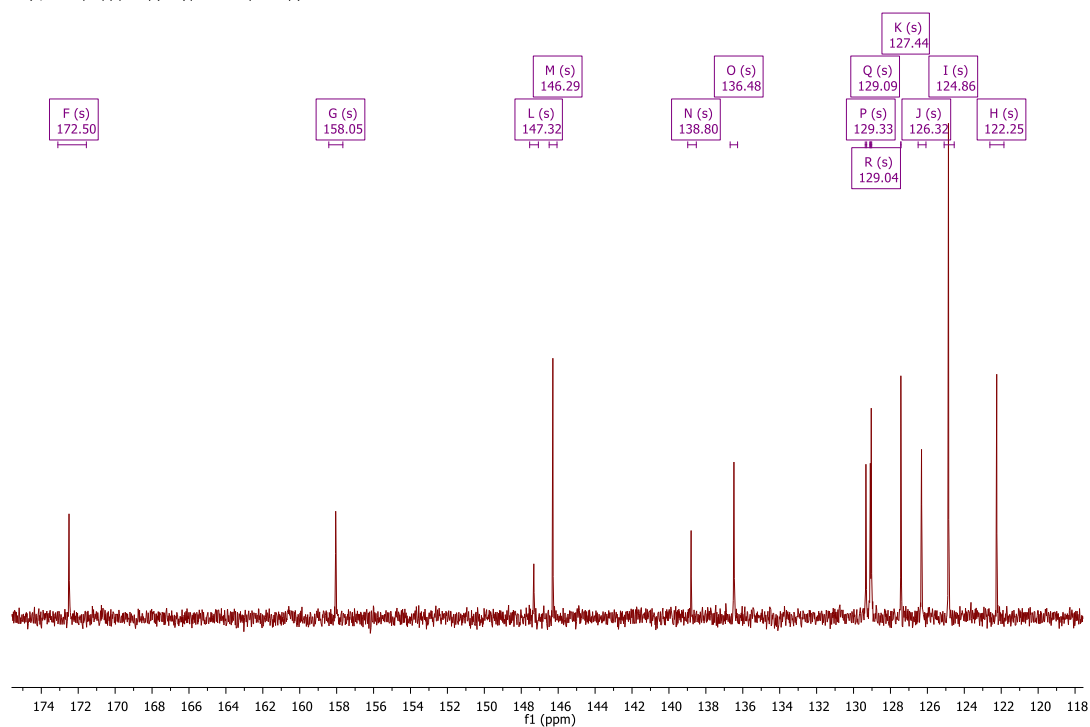

**Figure S15.**  $^{13}\text{C}$ -NMR spectrum of N-(2,6-diisopropylphenyl)-N-(quinolin-2-ylmethyl)acetamide **2** in  $\text{CDCl}_3$  at the 122.00-174.00 ppm region.

NMR 2D spectra – COSY, HSQC, HMBS of compound **2**

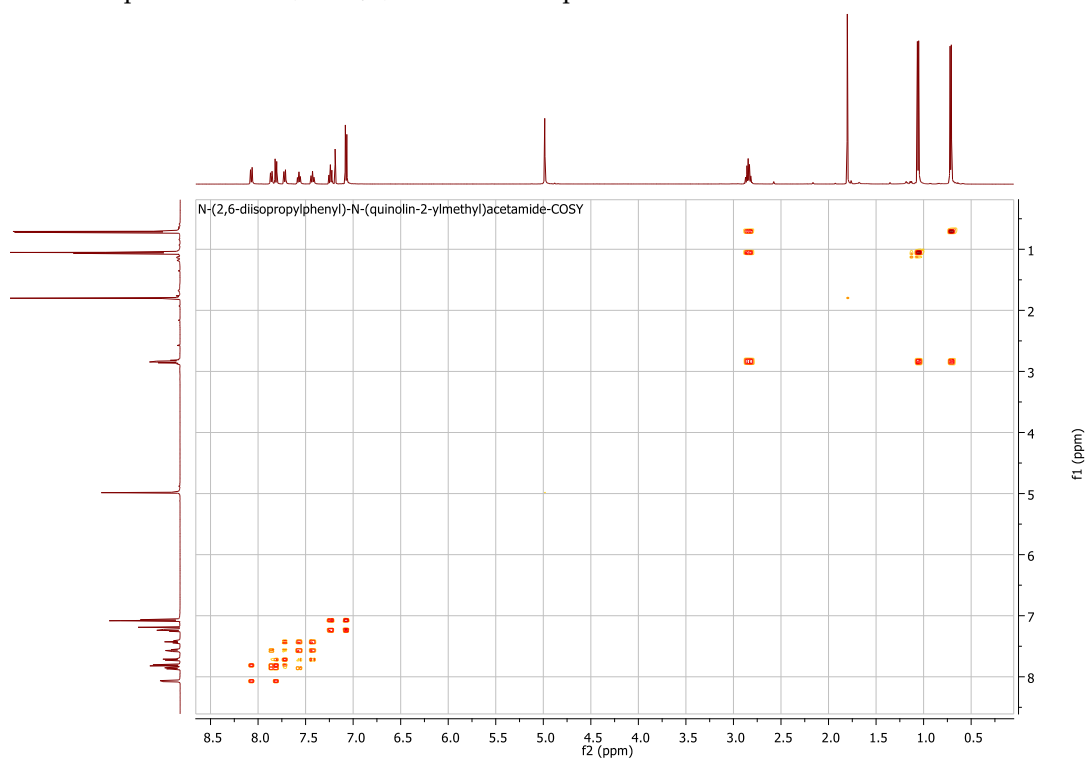

**Figure S16.** COSY NMR spectrum of N-(2,6-diisopropylphenyl)-N-(quinolin-2-ylmethyl)acetamide **2** in CDCl<sub>3</sub>.

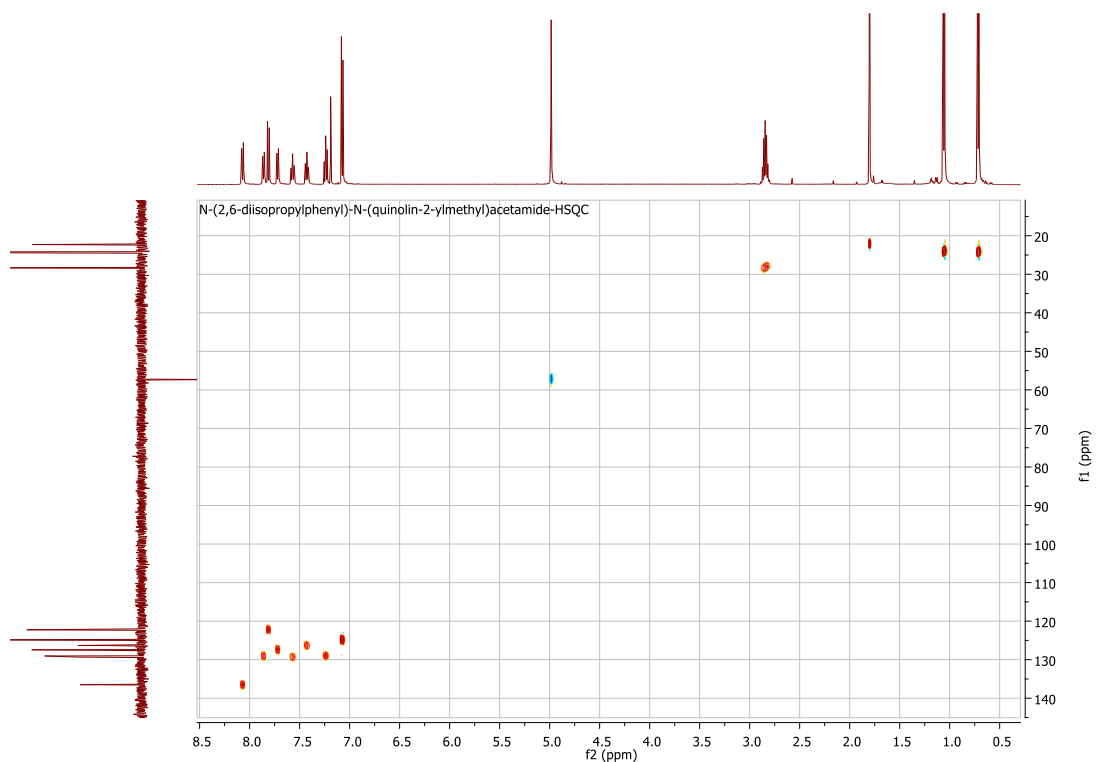

**Figure S17.** HSQC NMR spectrum of N-(2,6-diisopropylphenyl)-N-(quinolin-2-ylmethyl)acetamide **2** in CDCl<sub>3</sub>.

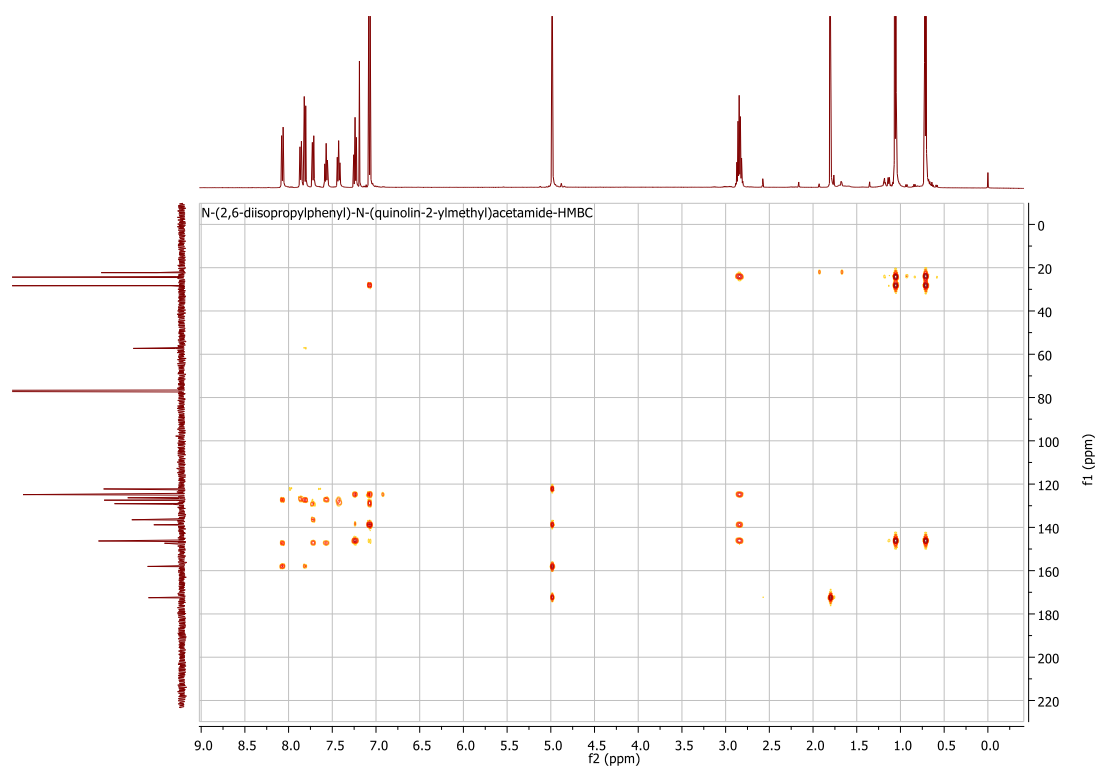

**Figure S18.** HMBC NMR spectrum of N-(2,6-diisopropylphenyl)-N-(quinolin-2-ylmethyl)acetamide **2** in CDCl<sub>3</sub>.

# NMR $^1\text{H}$ and $^{13}\text{C}$ -spectra of compound **1** in DMSO

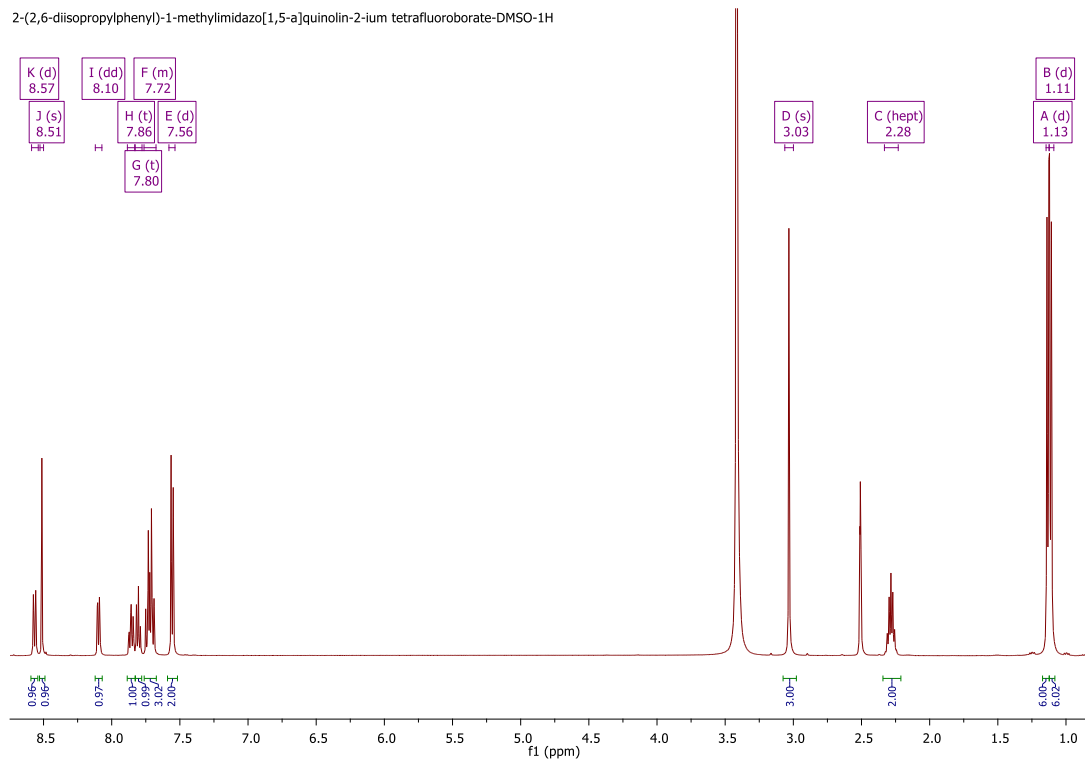

**Figure S19.**  $^1\text{H}$ -NMR spectrum of 2-(2,6-diisopropylphenyl)-1-methylimidazo[1,5-a]quinolin-2-ium tetrafluoroborate **1** in DMSO.

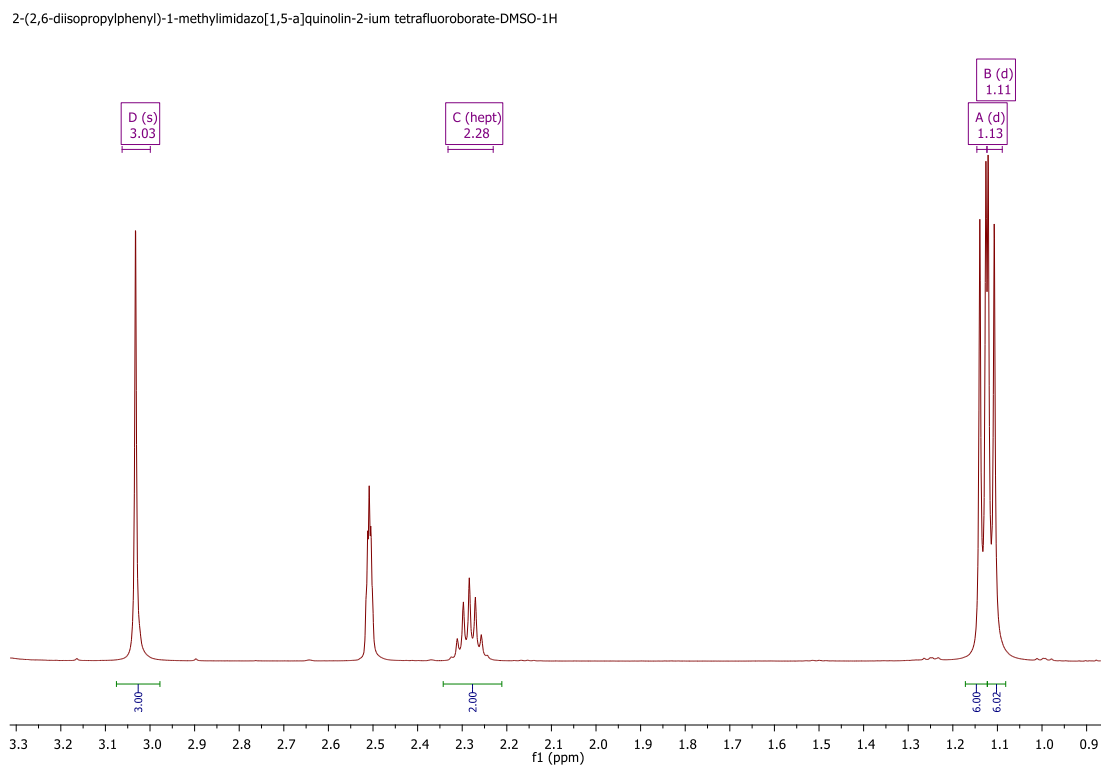

**Figure S20.**  $^1\text{H}$ -NMR spectrum of 2-(2,6-diisopropylphenyl)-1-methylimidazo[1,5-a]quinolin-2-ium tetrafluoroborate **1** in DMSO at the 1.0-3.1 ppm region.

2-(2,6-diisopropylphenyl)-1-methylimidazo[1,5-a]quinolin-2-ium tetrafluoroborate-DMSO-1H

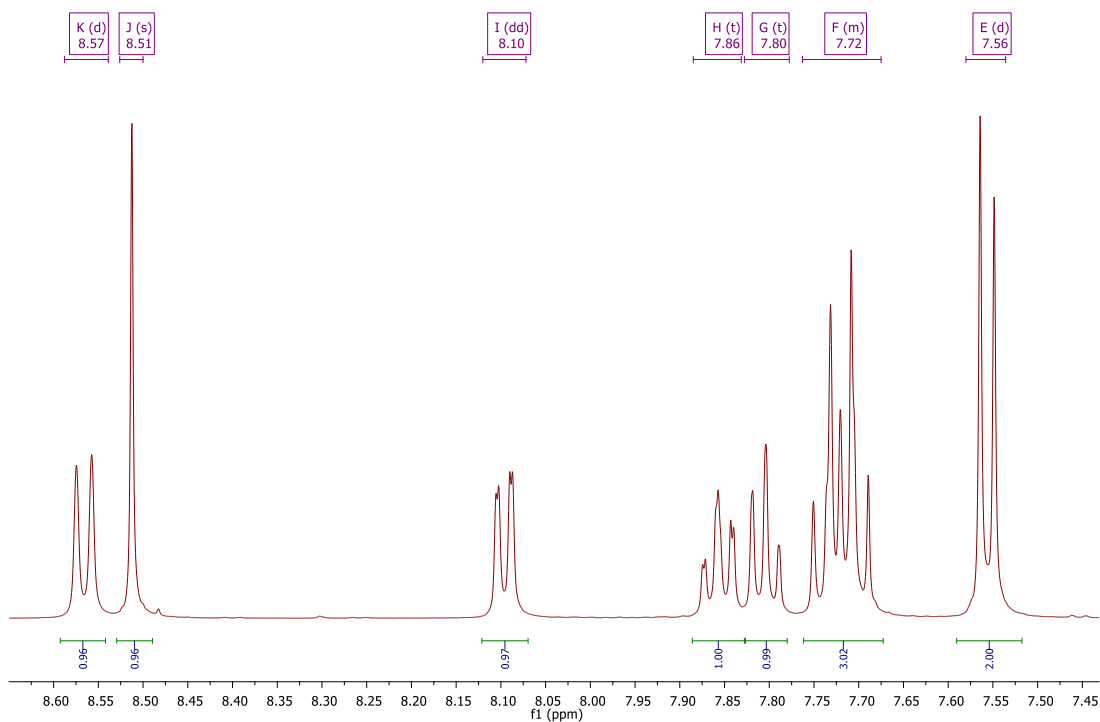

**Figure S21.**  $^1\text{H}$ -NMR spectrum of 2-(2,6-diisopropylphenyl)-1-methylimidazo[1,5-a]quinolin-2-ium tetrafluoroborate **1** in DMSO at the 7.50-8.60 ppm region.

2-(2,6-diisopropylphenyl)-1-methylimidazo[1,5-a]quinolin-2-ium tetrafluoroborate-DMSO-DEPT-135

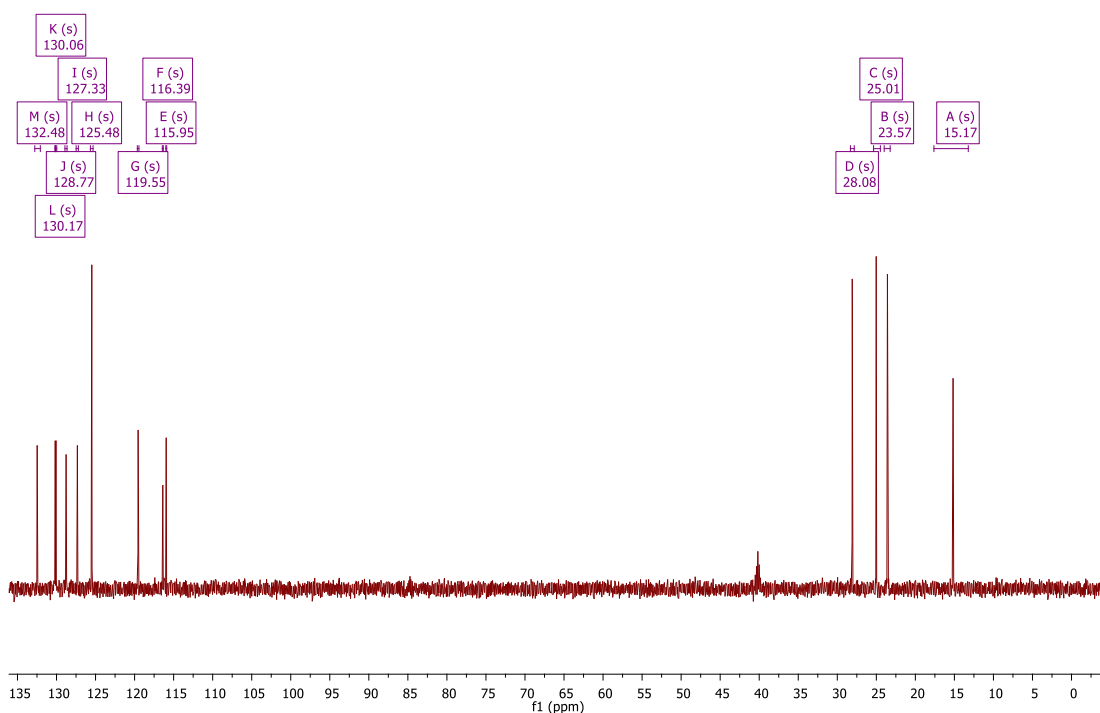

**Figure S22.** DEPT-135-NMR spectrum of 2-(2,6-diisopropylphenyl)-1-methylimidazo[1,5-a]quinolin-2-ium tetrafluoroborate **1** in DMSO.

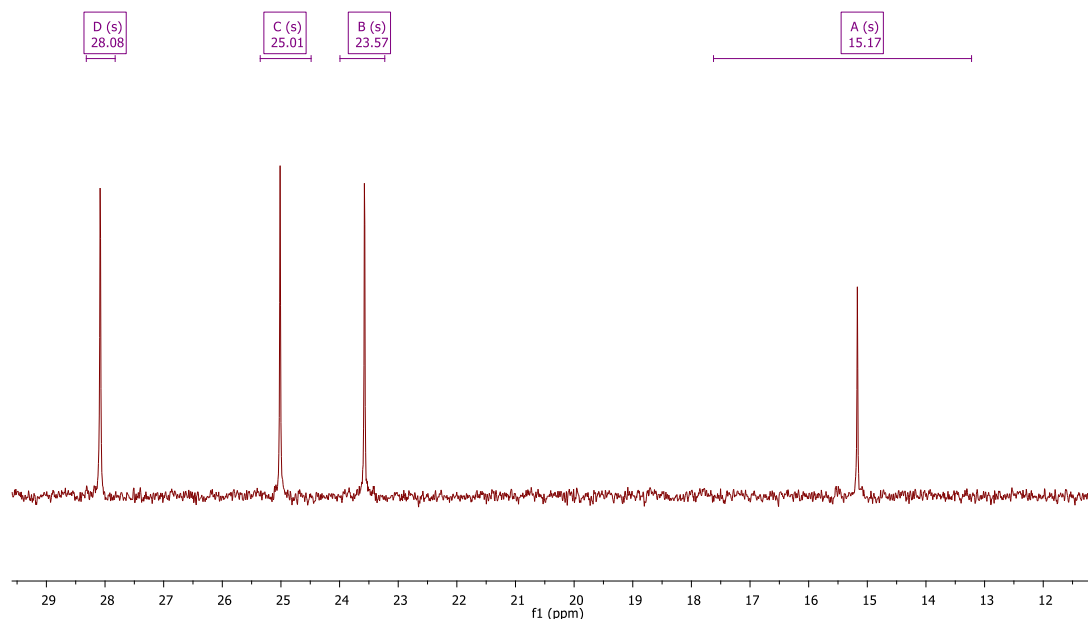

**Figure S23.** DEPT-135-NMR spectrum of 2-(2,6-diisopropylphenyl)-1-methylimidazo[1,5-a]quinolin-2-ium tetrafluoroborate **1** in DMSO at the 12.00-29.00 ppm region.

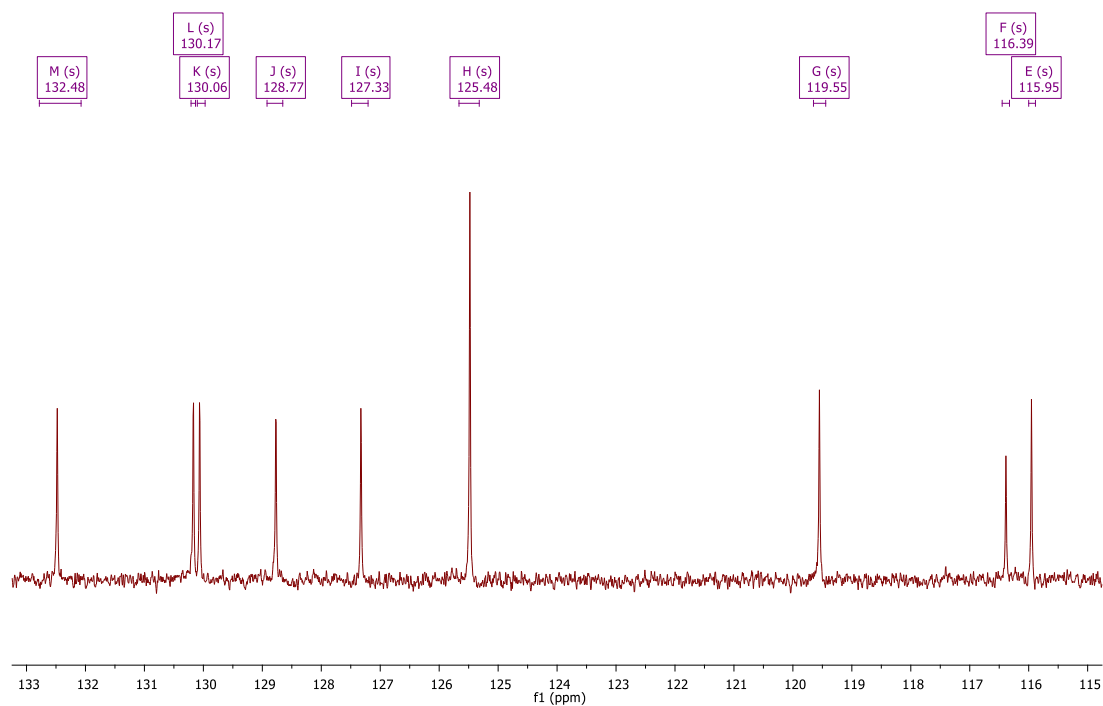

**Figure S24.** DEPT-135-NMR spectrum of 2-(2,6-diisopropylphenyl)-1-methylimidazo[1,5-a]quinolin-2-ium tetrafluoroborate **1** in DMSO at the 115.00-133.00 ppm region.

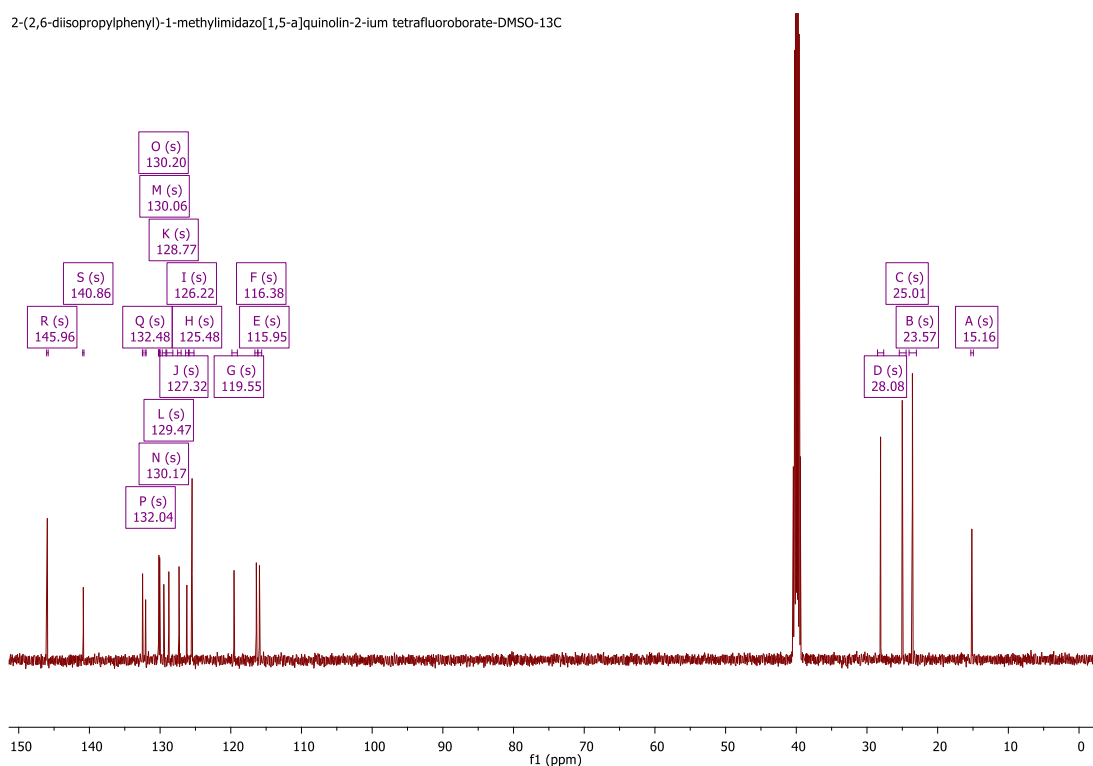

**Figure S25.**  $^{13}\text{C}$ -NMR spectrum of 2-(2,6-diisopropylphenyl)-1-methylimidazo[1,5-a]quinolin-2-ium tetrafluoroborate **1** in DMSO.

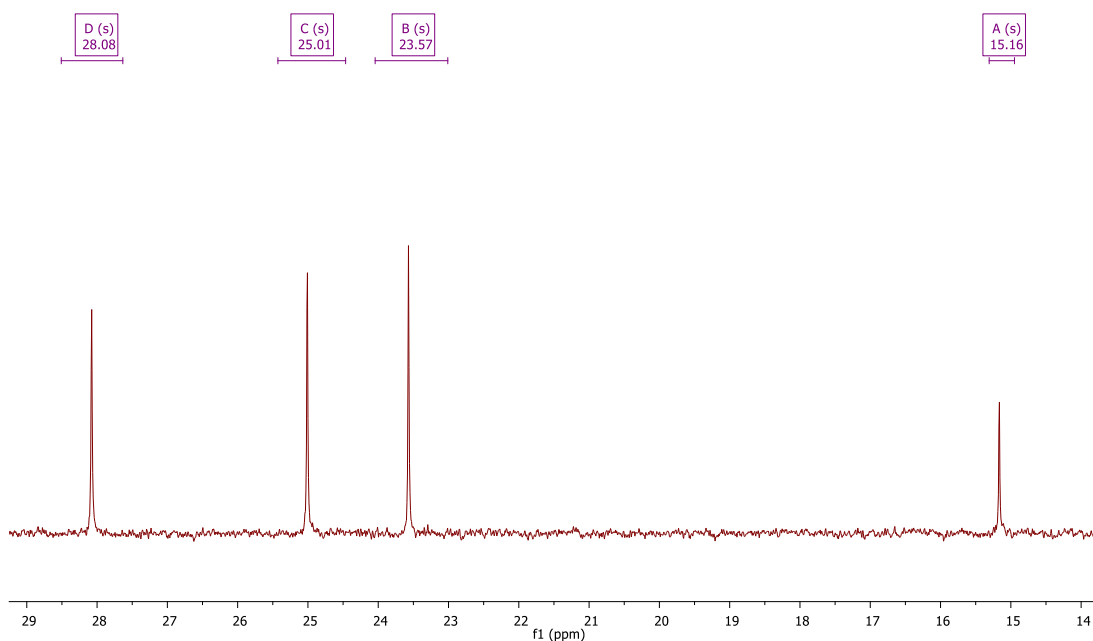

**Figure S26.**  $^{13}\text{C}$ -NMR spectrum of 2-(2,6-diisopropylphenyl)-1-methylimidazo[1,5-a]quinolin-2-ium tetrafluoroborate **1** in DMSO at the 15.00-29.00 ppm region.



2-(2,6-diisopropylphenyl)-1-methylimidazo[1,5-a]quinolin-2-ium tetrafluoroborate-DMSO-13C

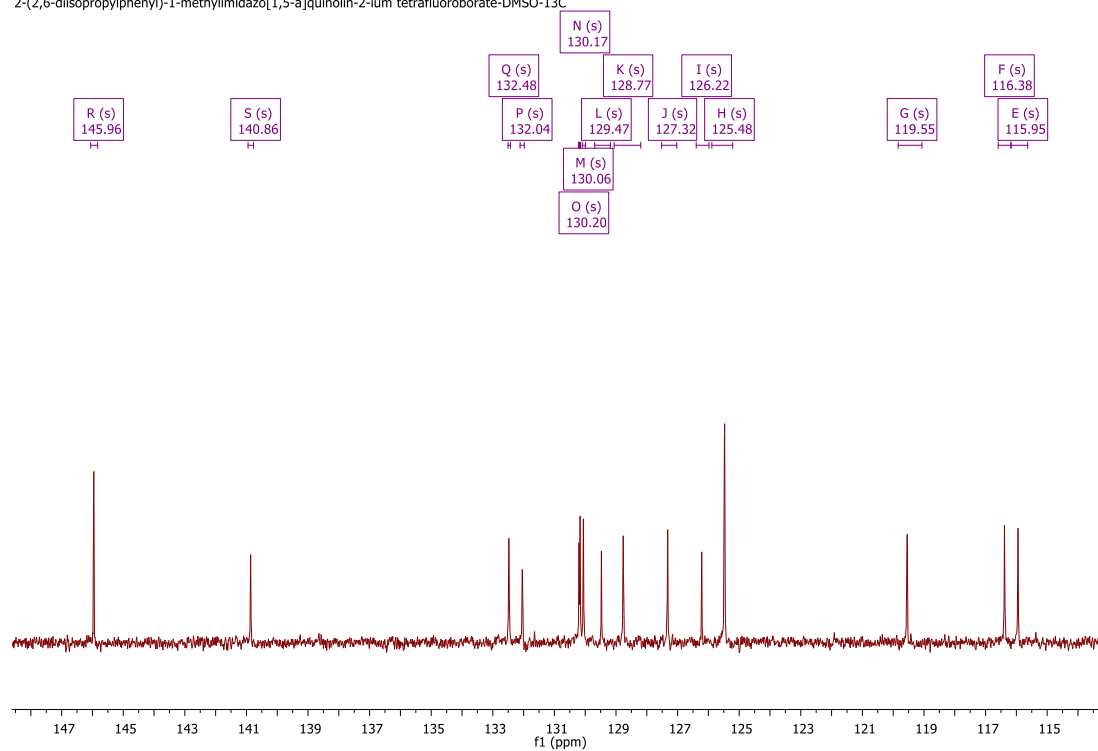

**Figure S27.**  $^{13}\text{C}$ -NMR spectrum of 2-(2,6-diisopropylphenyl)-1-methylimidazo[1,5-a]quinolin-2-ium tetrafluoroborate **1** in DMSO at the 115.00-147.00 ppm region.

NMR 2D spectra – COSY, HSQC, HMBS of compound **1** in DMSO

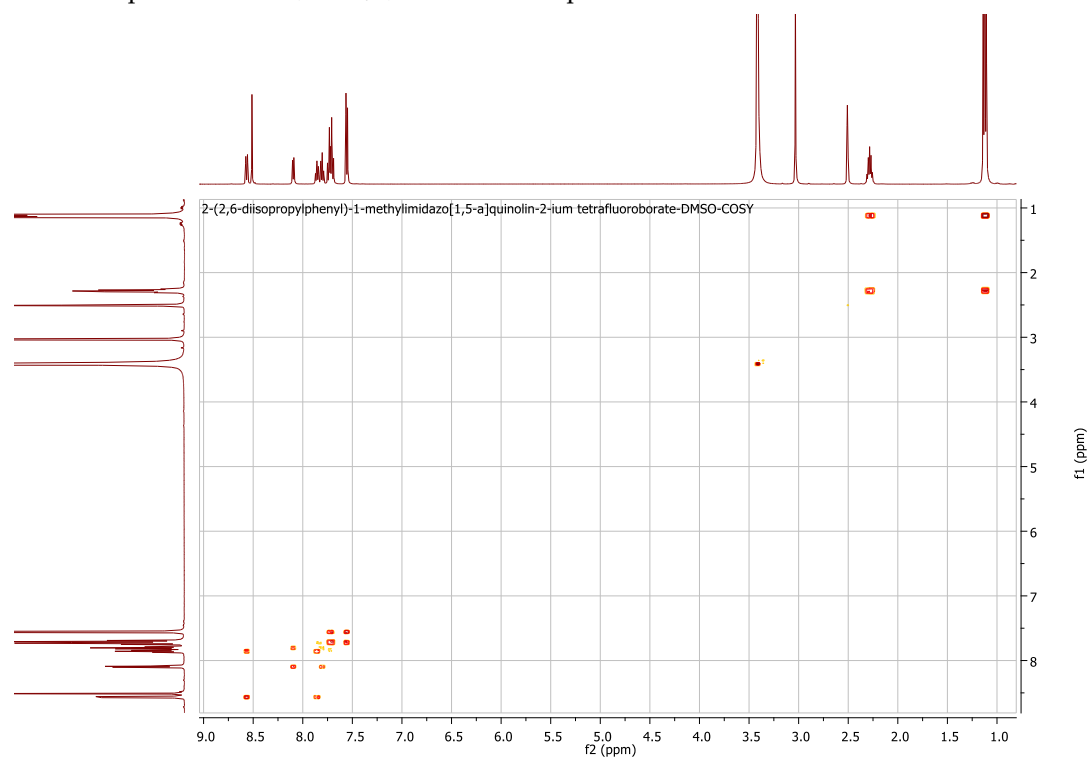

**Figure S28.** COSY-NMR spectrum of 2-(2,6-diisopropylphenyl)-1-methylimidazo[1,5-a]quinolin-2-ium tetrafluoroborate **1** in DMSO.

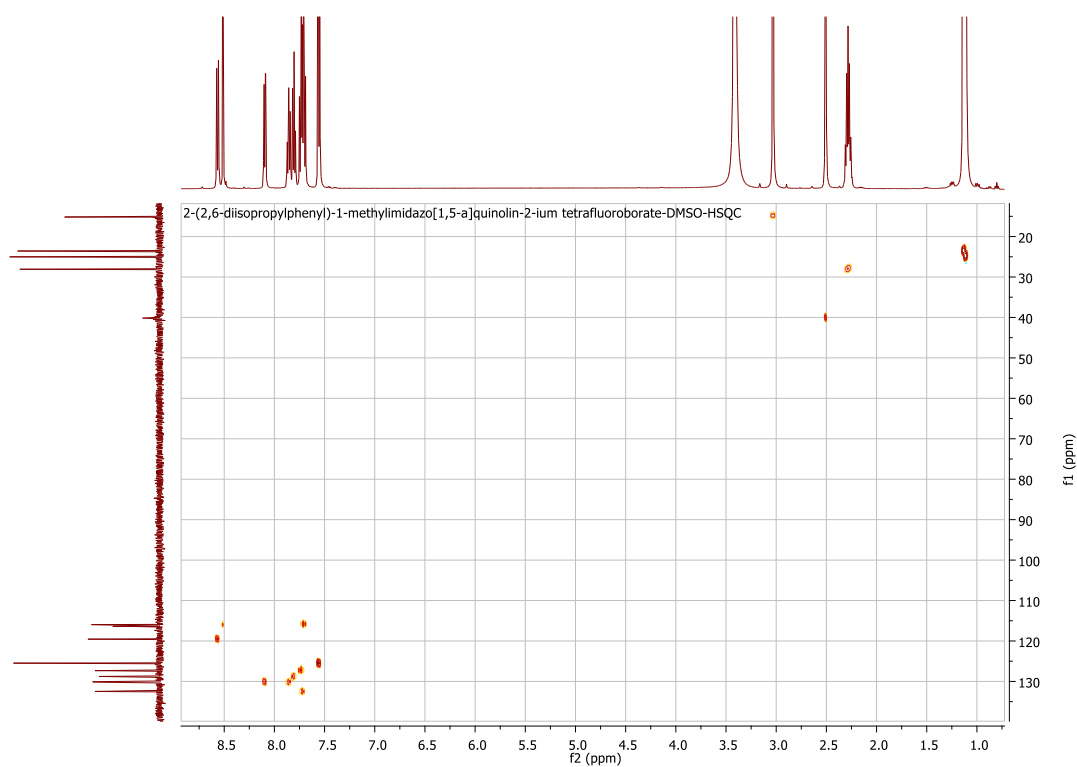

**Figure S29.** HSQC-NMR spectrum of 2-(2,6-diisopropylphenyl)-1-methylimidazo[1,5-a]quinolin-2-ium tetrafluoroborate **1** in DMSO.

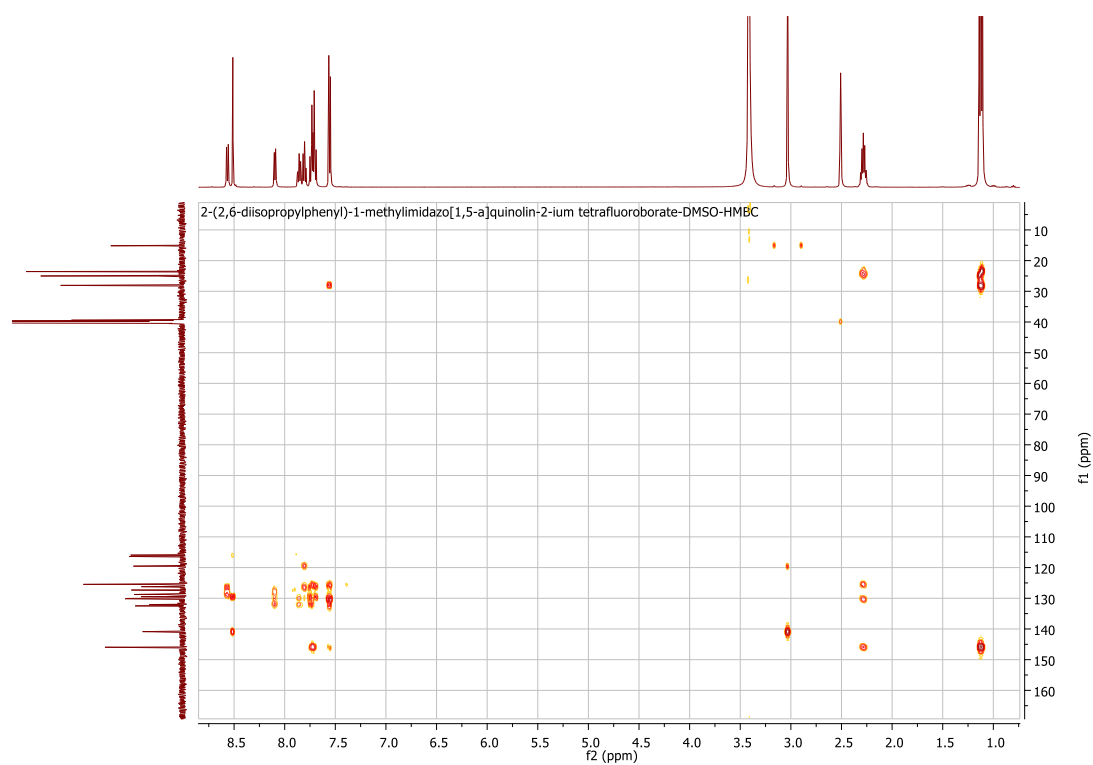

**Figure S30.** HMBC-NMR spectrum of 2-(2,6-diisopropylphenyl)-1-methylimidazo[1,5-a]quinolin-2-ium tetrafluoroborate **1** in DMSO.

# NMR $^1\text{H}$ and $^{13}\text{C}$ -spectra of compound **1** in methanol

2-(2,6-diisopropylphenyl)-1-methylimidazo[1,5-a]quinolin-2-ium tetrafluoroborate-MeOH-1H

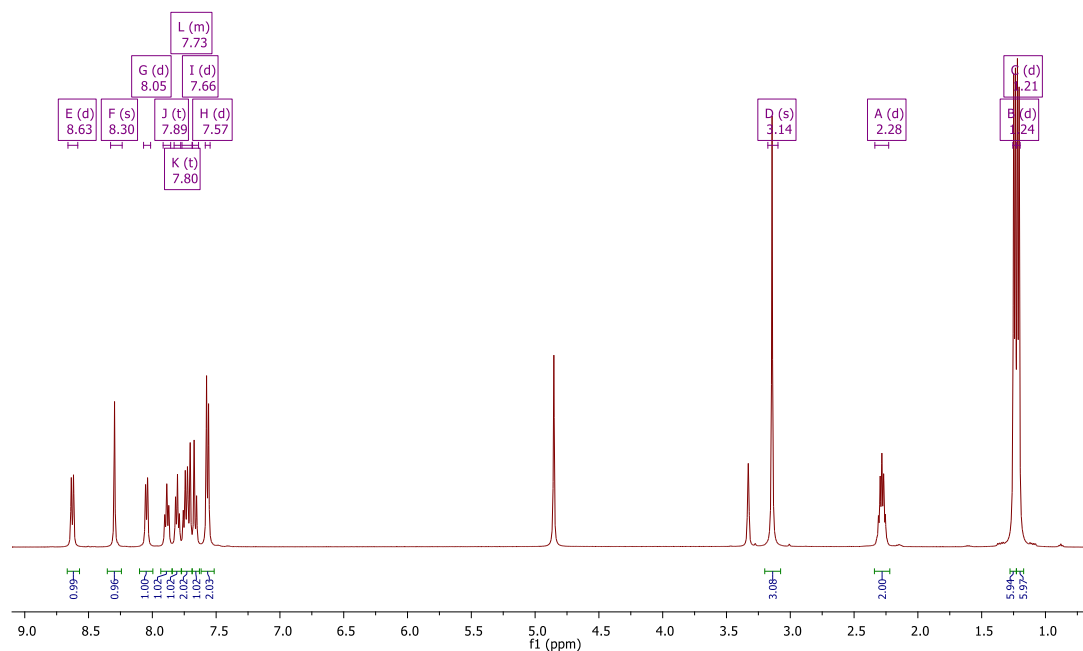

**Figure S31.**  $^1\text{H}$ -NMR spectrum of 2-(2,6-diisopropylphenyl)-1-methylimidazo[1,5-a]quinolin-2-ium tetrafluoroborate **1** in methanol.

2-(2,6-diisopropylphenyl)-1-methylimidazo[1,5-a]quinolin-2-ium tetrafluoroborate-MeOH-1H

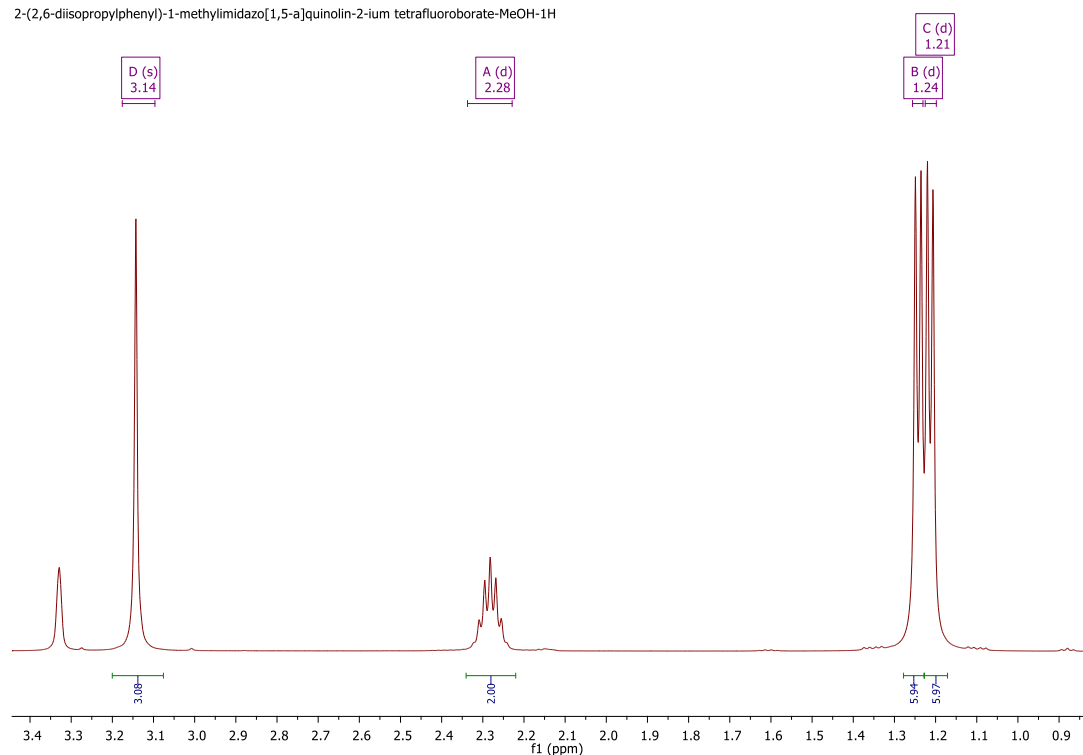

**Figure S32.**  $^1\text{H}$ -NMR spectrum of 2-(2,6-diisopropylphenyl)-1-methylimidazo[1,5-a]quinolin-2-ium tetrafluoroborate **1** in methanol at the 1.00-3.40 ppm region.

2-(2,6-diisopropylphenyl)-1-methylimidazo[1,5-a]quinolin-2-ium tetrafluoroborate-MeOH-1H

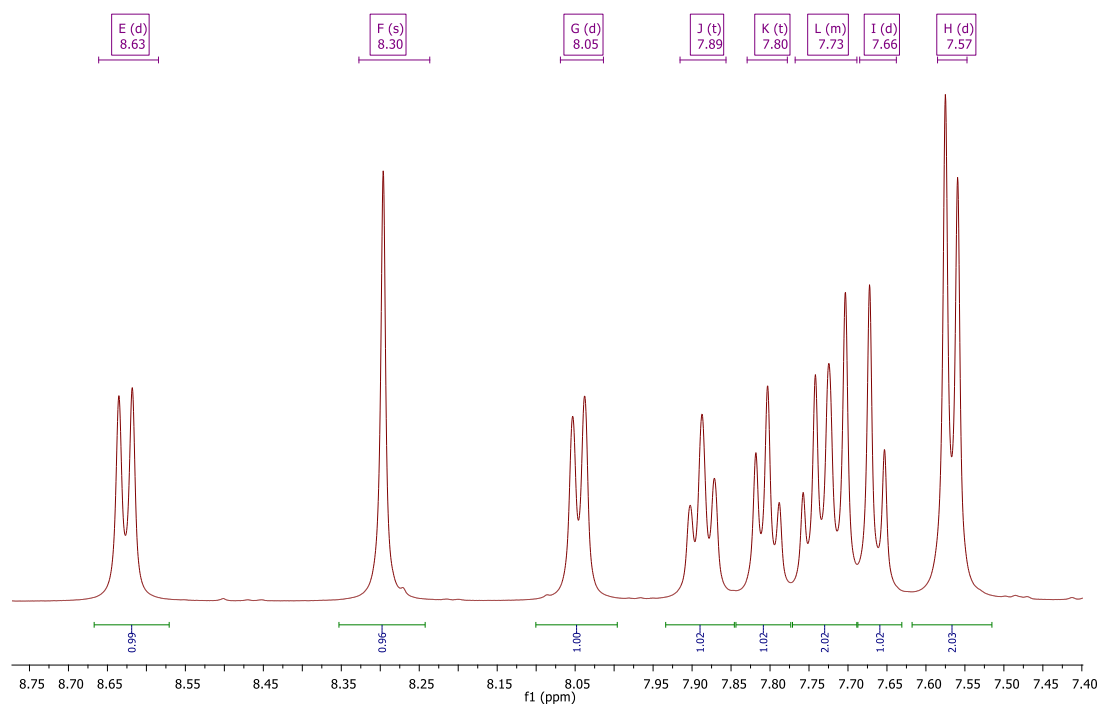

**Figure S33.**  $^1\text{H}$ -NMR spectrum of 2-(2,6-diisopropylphenyl)-1-methylimidazo[1,5-a]quinolin-2-ium tetrafluoroborate **1** in methanol at the 7.40-8.70 ppm region.

2-(2,6-diisopropylphenyl)-1-methylimidazo[1,5-a]quinolin-2-ium tetrafluoroborate-MeOH-DEPT-135

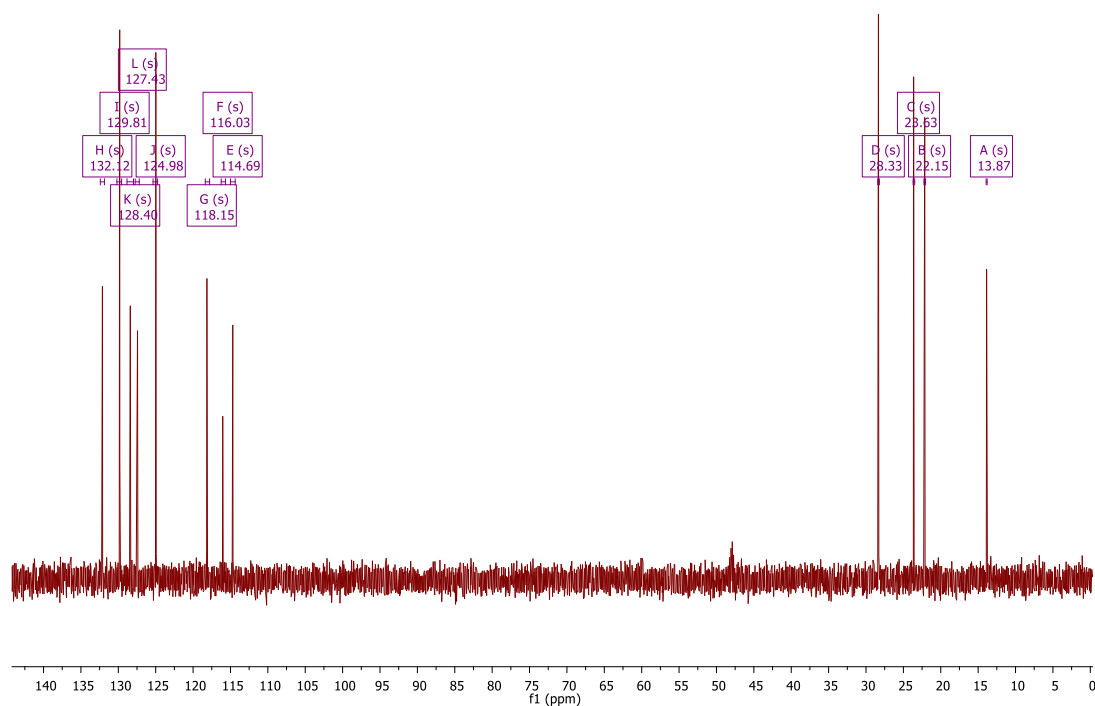

**Figure S34.** DEPT-135-NMR spectrum of 2-(2,6-diisopropylphenyl)-1-methylimidazo[1,5-a]quinolin-2-ium tetrafluoroborate **1** in methanol.

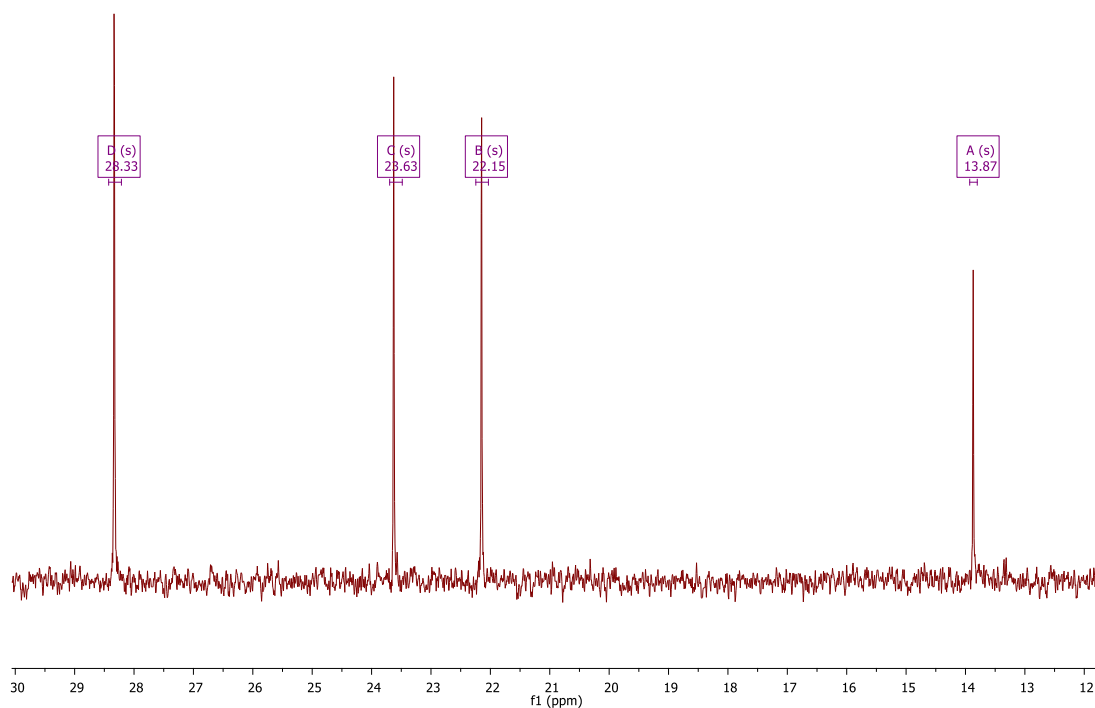

**Figure S35.** DEPT-135-NMR spectrum of 2-(2,6-diisopropylphenyl)-1-methylimidazo[1,5-a]quinolin-2-ium tetrafluoroborate **1** in methanol at the 13.00-29.00 ppm region.

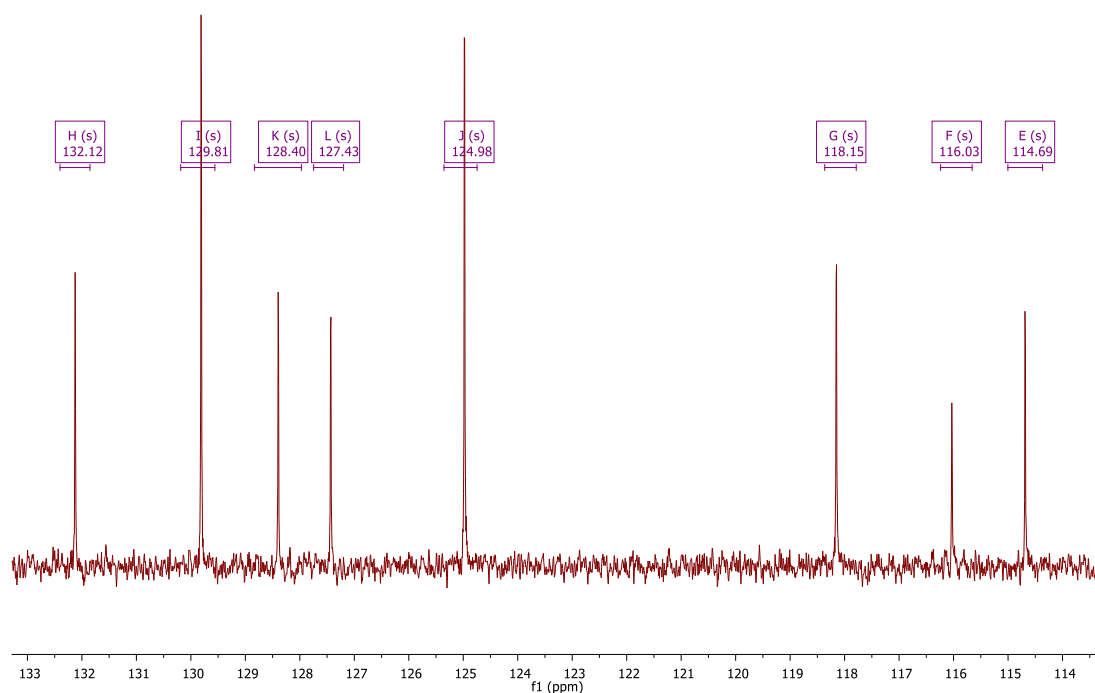

**Figure S36.** DEPT-135-NMR spectrum of 2-(2,6-diisopropylphenyl)-1-methylimidazo[1,5-a]quinolin-2-ium tetrafluoroborate **1** in methanol at the 114.00-133.00 ppm region.

2-(2,6-diisopropylphenyl)-1-methylimidazo[1,5-a]quinolin-2-ium tetrafluoroborate-MeOH-13C

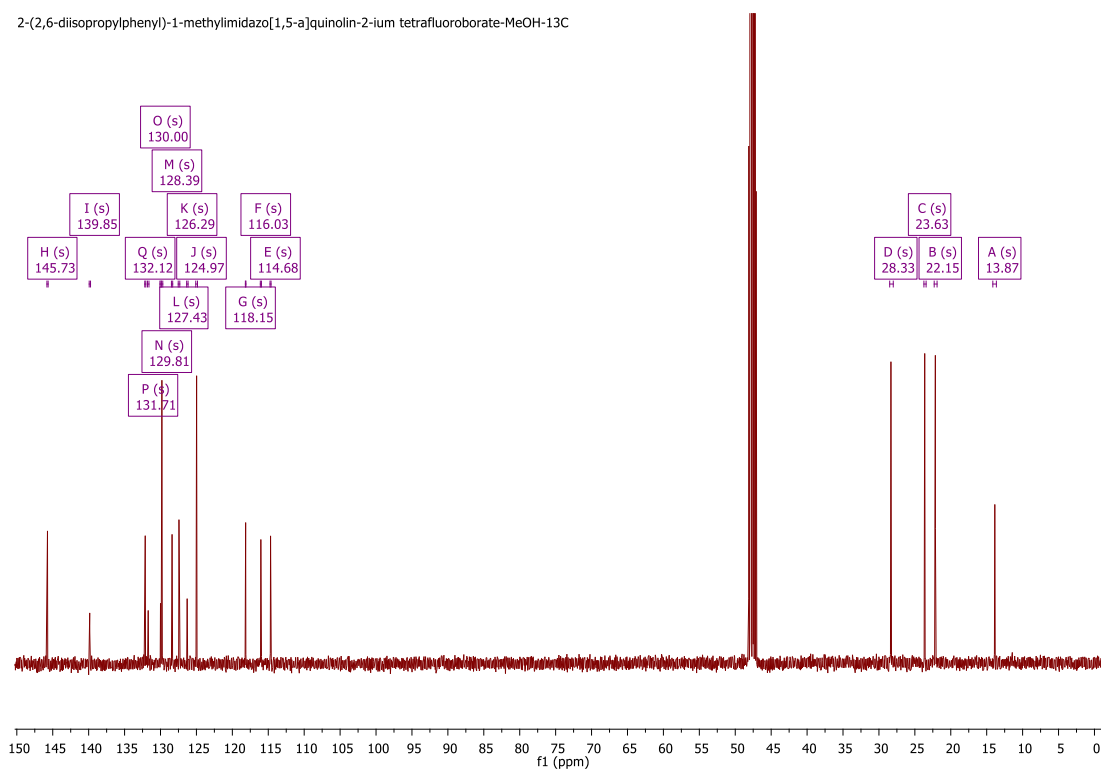

**Figure S37.**  $^{13}\text{C}$ -NMR spectrum of 2-(2,6-diisopropylphenyl)-1-methylimidazo[1,5-a]quinolin-2-ium tetrafluoroborate **1** in methanol.

2-(2,6-diisopropylphenyl)-1-methylimidazo[1,5-a]quinolin-2-ium tetrafluoroborate-MeOH-13C

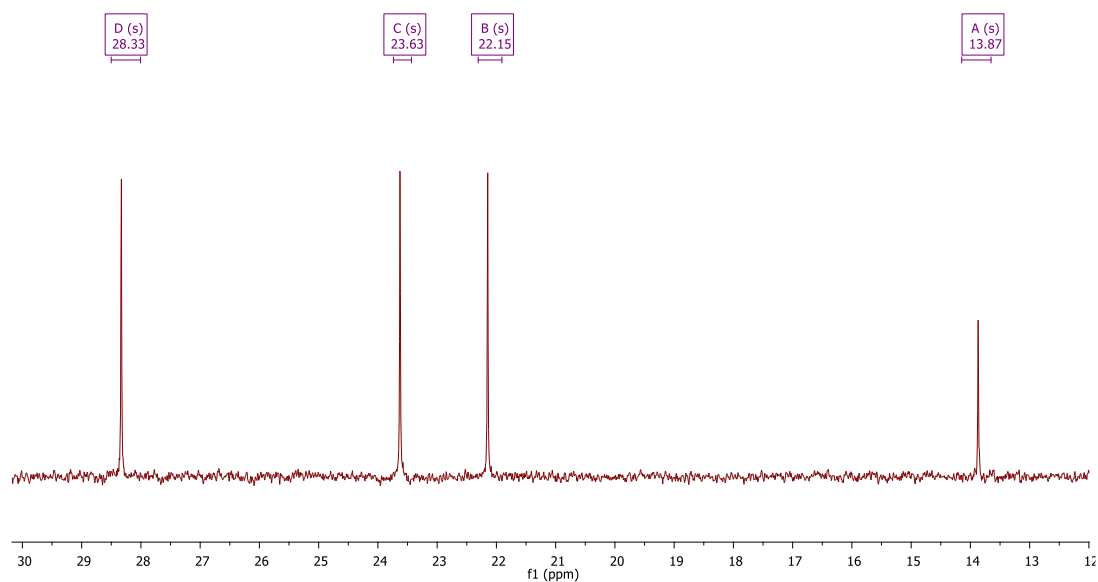

**Figure S38.**  $^{13}\text{C}$ -NMR spectrum of 2-(2,6-diisopropylphenyl)-1-methylimidazo[1,5-a]quinolin-2-ium tetrafluoroborate **1** in methanol at the 13.00-29.00 ppm region.

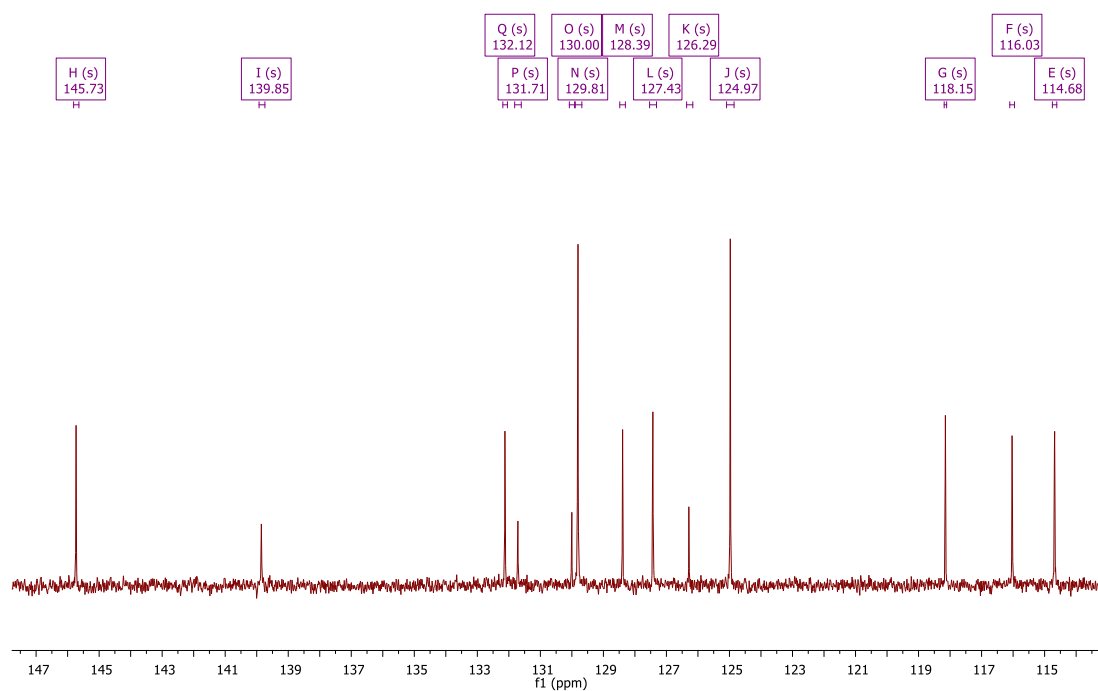

**Figure S39.**  $^{13}\text{C}$ -NMR spectrum of 2-(2,6-diisopropylphenyl)-1-methylimidazo[1,5-a]quinolin-2-ium tetrafluoroborate **1** in methanol at the 114.00-147.00 ppm region.



NMR 2D spectra – COSY, HSQC, HMBS of compound **1** in methanol

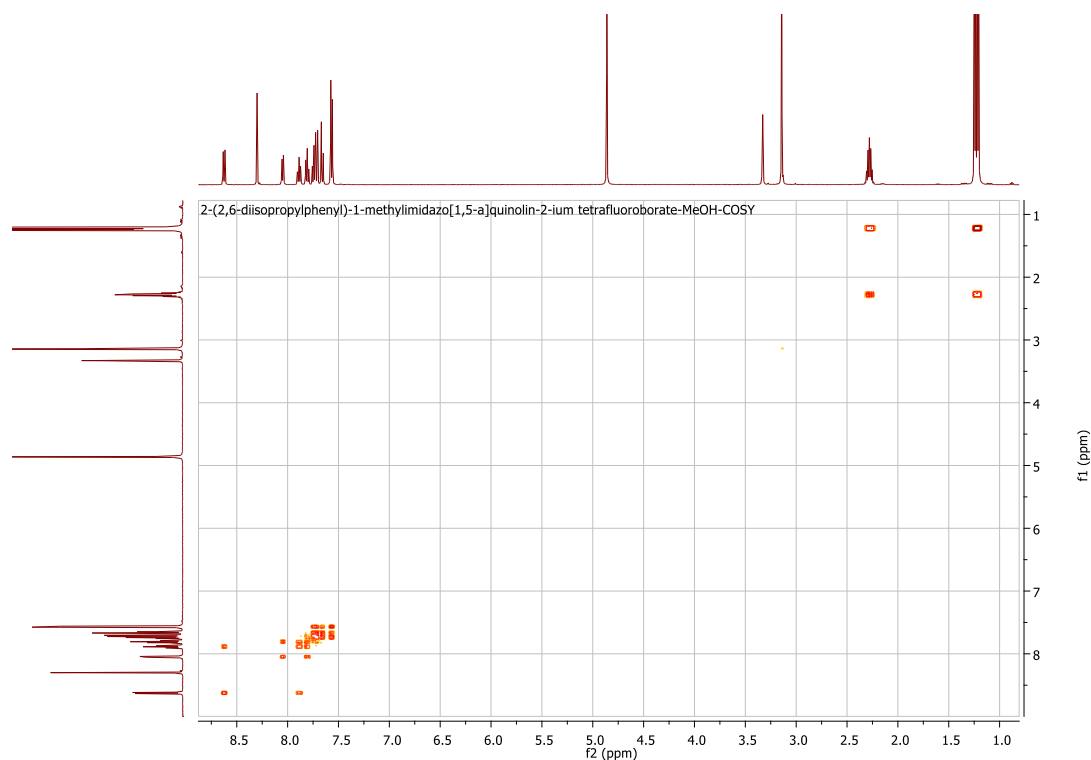

**Figure S40.** COSY-NMR spectrum of 2-(2,6-diisopropylphenyl)-1-methylimidazo[1,5-a]quinolin-2-ium tetrafluoroborate **1** in methanol.

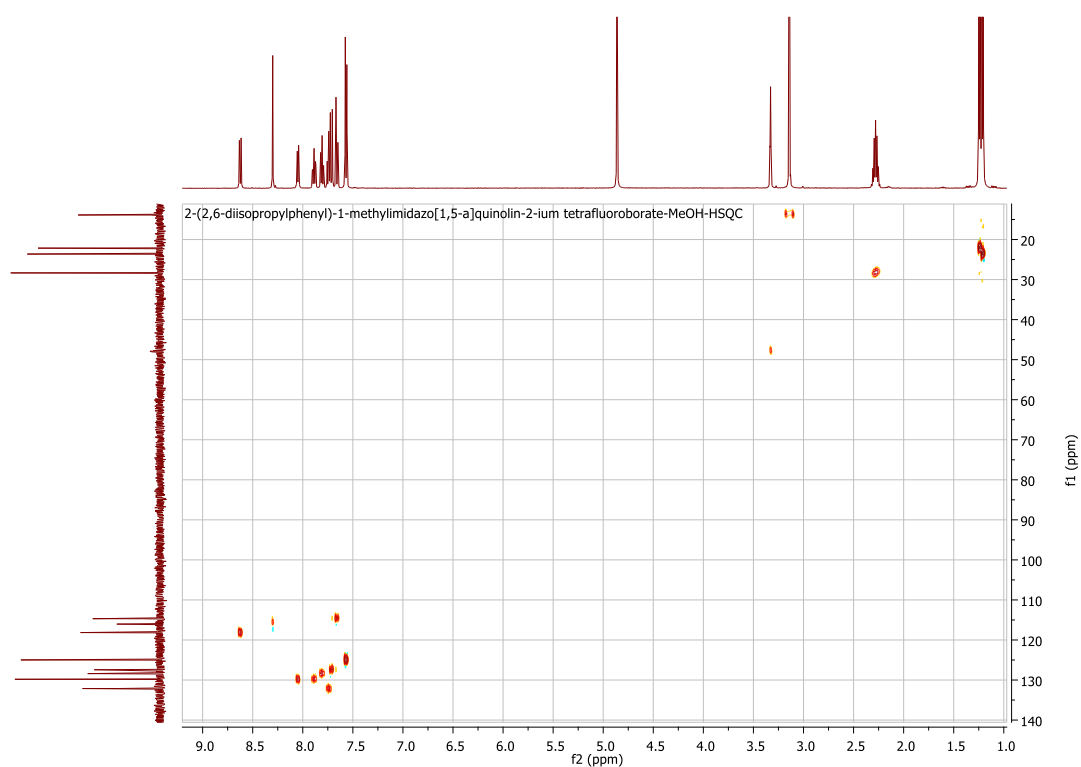

**Figure S41.** HSQC-NMR spectrum of 2-(2,6-diisopropylphenyl)-1-methylimidazo[1,5-a]quinolin-2-ium tetrafluoroborate **1** in methanol.

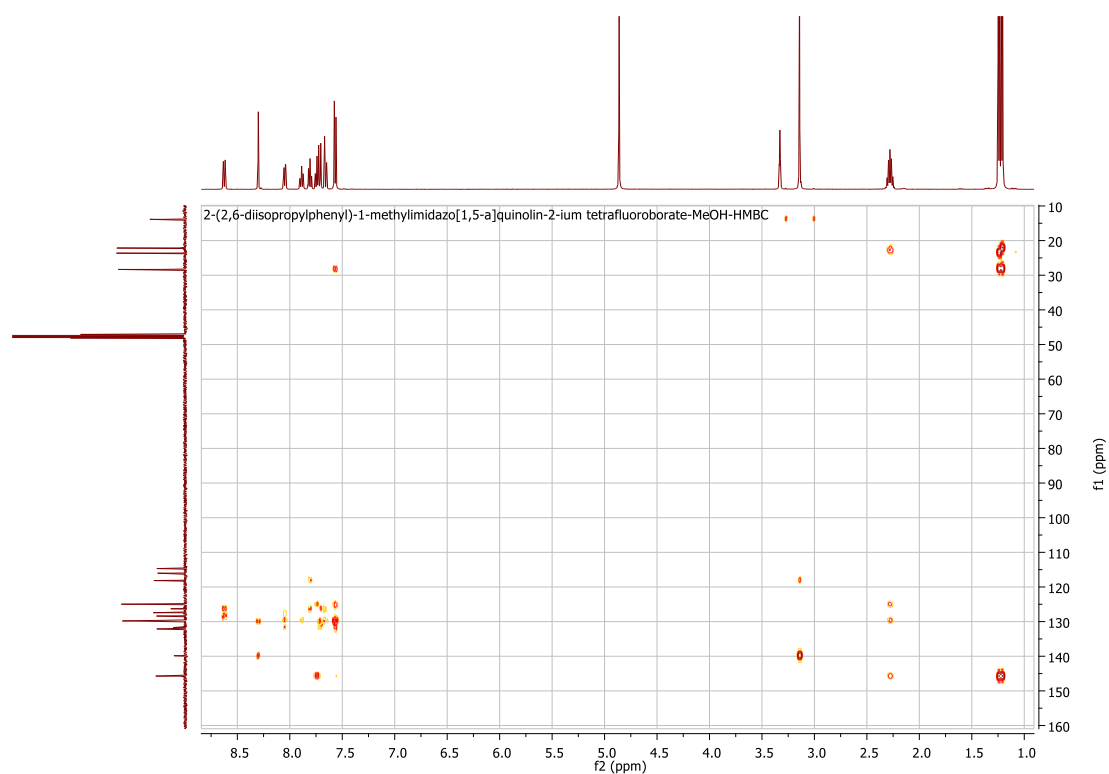

**Figure S42.** HMBC-NMR spectrum of 2-(2,6-diisopropylphenyl)-1-methylimidazo[1,5-a]quinolin-2-ium tetrafluoroborate **1** in methanol.

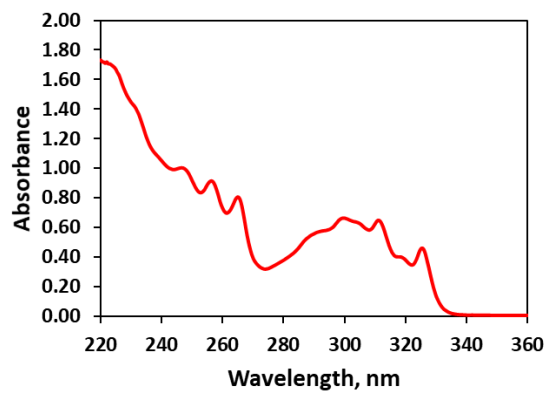

(a)

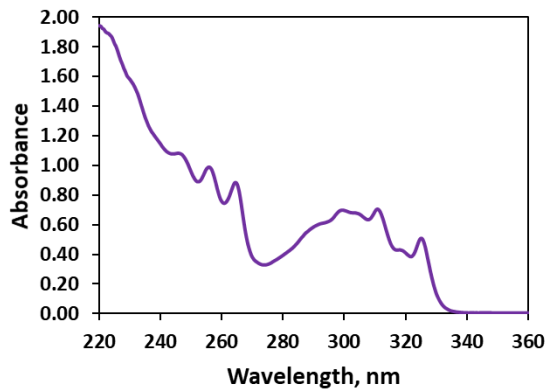

(b)

**Figure S43.** UV spectra of 2-(2,6-diisopropylphenyl)-1-methylimidazo[1,5-a]quinolin-2-ium tetrafluoroborate **1** in (a) MeOH and (b) MeCN.

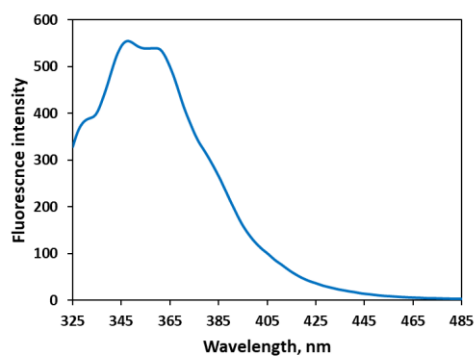

(a)

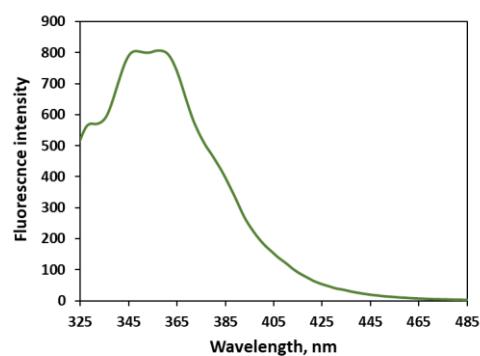

(b)

**Figure S44.** Fluorescent spectra of 2-(2,6-diisopropylphenyl)-1-methylimidazo[1,5-a]quinolin-2-ium tetra-fluoroborate **1** in (a) MeOH, concentration  $4.1 \times 10^{-7}$  M and (b) MeCN, concentration  $7.5 \times 10^{-7}$  M. Excitation at 325 nm.

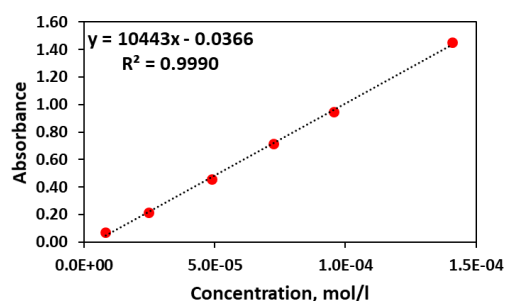

(a)

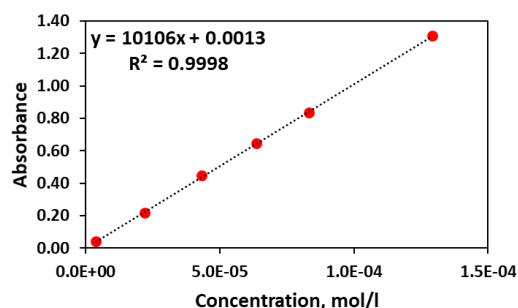

(b)

**Figure S45.** Calibration curves of 2-(2,6-diisopropylphenyl)-1-methylimidazo[1,5-a]quinolin-2-ium tetra-fluoroborate – compound **1** in (a) MeOH and (b) MeCN. The dilutions are summarized in Table S1.

**Table S1.** Dilutions for the calibration curves.  $V_1$  is the volume of the stock solution diluted to  $V_2$ .

| Solvent | Mass of compound <b>1</b> for the stock solution (g/10 mL) | $V_1$ (μL) | $V_2$ (μL) | Concentration (mol/l) | Absorbance |
|---------|------------------------------------------------------------|------------|------------|-----------------------|------------|
| MeOH    | 0.01067                                                    | 10         | 3000       | $8.27\text{E-}06$     | 0.073      |
|         |                                                            | 30         | 3020       | $2.46\text{E-}05$     | 0.214      |
|         |                                                            | 60         | 3050       | $4.88\text{E-}05$     | 0.458      |
|         |                                                            | 90         | 3080       | $7.25\text{E-}05$     | 0.716      |
|         |                                                            | 120        | 3110       | $9.57\text{E-}05$     | 0.948      |
|         |                                                            | 180        | 3170       | $1.41\text{E-}04$     | 1.451      |
| MeCN    | 0.00482                                                    | 10         | 3000       | $3.73\text{E-}06$     | 0.040      |
|         |                                                            | 60         | 3050       | $2.20\text{E-}05$     | 0.217      |
|         |                                                            | 120        | 3110       | $4.32\text{E-}05$     | 0.447      |
|         |                                                            | 180        | 3170       | $6.36\text{E-}05$     | 0.647      |
|         |                                                            | 240        | 3230       | $8.32\text{E-}05$     | 0.835      |
|         |                                                            | 390        | 3380       | $1.29\text{E-}04$     | 1.309      |

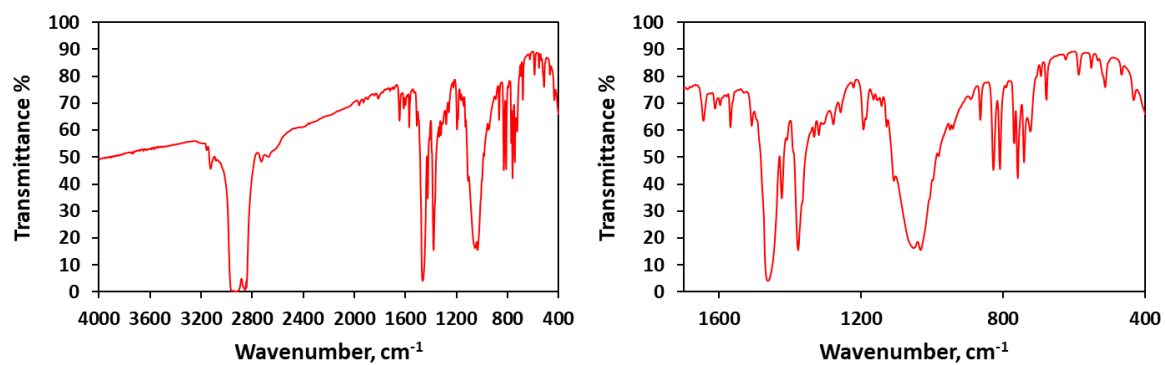

**Figure S46.** IR spectrum of 2-(2,6-diisopropylphenyl)-1-methylimidazo[1,5-a]quinolin-2-ium tetrafluoroborate **1** (nujol mull). For visual clarity the range 1700 – 400 cm<sup>-1</sup> is magnified (right image). Nujol absorbs in the range of 3000-2800 cm<sup>-1</sup> and at 1460 cm<sup>-1</sup> and 1380 cm<sup>-1</sup>.
